# Supplementary material for: Marital status and survival after oesophageal cancer surgery: a population-based nationwide cohort study in Sweden
Source: PubMed Central journal article supplement — BMJ Open. 2014 Jun 6;4(6):e005418. doi: 10.1136/bmjopen-2014-005418 (PMC4054621; doi:10.1136/bmjopen-2014-005418), 2014-06-06
Supplement: bmjopen-2014-005418.draft_revisions.pdf [file bmjopen-2014-005418.draft_revisions.pdf]

# BMJ Open

## Marital status and survival after oesophageal cancer surgery: A population-based nationwide cohort study in Sweden

|                                 |                                                                                                                                                                                                                                                                                                                                                                                                                                                                                                                                                                                                                                                          |
|---------------------------------|----------------------------------------------------------------------------------------------------------------------------------------------------------------------------------------------------------------------------------------------------------------------------------------------------------------------------------------------------------------------------------------------------------------------------------------------------------------------------------------------------------------------------------------------------------------------------------------------------------------------------------------------------------|
| Journal:                        | <i>BMJ Open</i>                                                                                                                                                                                                                                                                                                                                                                                                                                                                                                                                                                                                                                          |
| Manuscript ID:                  | bmjopen-2014-005418                                                                                                                                                                                                                                                                                                                                                                                                                                                                                                                                                                                                                                      |
| Article Type:                   | Research                                                                                                                                                                                                                                                                                                                                                                                                                                                                                                                                                                                                                                                 |
| Date Submitted by the Author:   | 07-Apr-2014                                                                                                                                                                                                                                                                                                                                                                                                                                                                                                                                                                                                                                              |
| Complete List of Authors:       | Brusselaers, Nele; Karolinska Institutet, Molecular medicine and Surgery<br>Mattsson, Fredrik; Karolinska Institutet, Upper Gastrointestinal Research, Department of Molecular Medicine and Surgery<br>Johar, Asif; Karolinska Institutet, Upper Gastrointestinal Research, Department of Molecular Medicine and Surgery<br>Wikman, Anna; Karolinska Institute, Molecular Medicine and Surgery<br>Lagergren, Pernilla; Karolinska Institute, Department of Molecular Medicine and Surgery<br>Lagergren, Jesper; King's College London, Division of Cancer Studies<br>Ljung, Rickard; Karolinska Institutet, Department of Molecular Medicine and Surgery |
| <b>Primary Subject Heading</b>: | Oncology                                                                                                                                                                                                                                                                                                                                                                                                                                                                                                                                                                                                                                                 |
| Secondary Subject Heading:      | Epidemiology, Gastroenterology and hepatology, Surgery                                                                                                                                                                                                                                                                                                                                                                                                                                                                                                                                                                                                   |
| Keywords:                       | oesophageal cancer, marital status, survival                                                                                                                                                                                                                                                                                                                                                                                                                                                                                                                                                                                                             |
|                                 |                                                                                                                                                                                                                                                                                                                                                                                                                                                                                                                                                                                                                                                          |

SCHOLARONE™  
Manuscripts

1  
2  
3 **Marital status and survival after oesophageal cancer surgery:**

4  
5  
6 **A population-based nationwide cohort study in Sweden**

7  
8  
9  
10  
11 **Authors:** Nele BRUSSELAERS MD PhD<sup>1</sup>, Fredrik MATTSSON BSc<sup>1</sup>, Asif JOHAR MSc<sup>1</sup>,  
12  
13 Anna WIKMAN PhD<sup>1</sup>, Pernilla LAGERGREN PhD<sup>1</sup>, Jesper LAGERGREN MD PhD<sup>1,2</sup>  
14  
15 Rickard LJUNG MD PhD<sup>1,3</sup>.  
16

17  
18  
19  
20  
21 **Affiliations:** <sup>1</sup>Unit of Upper Gastrointestinal Research, Department of Molecular medicine  
22  
23 and Surgery, Karolinska Institutet, Stockholm, Sweden.

24  
25 <sup>2</sup>Division of Cancer Studies, King's College London, London, United Kingdom.

26  
27 <sup>3</sup>Unit of Epidemiology, Institute of Environmental Medicine, Karolinska Institutet,  
28  
29 Stockholm, Sweden.  
30

31  
32 **Email addresses:** [nele.brusselaers@ki.se](mailto:nele.brusselaers@ki.se); [fredrik.mattsson@ki.se](mailto:fredrik.mattsson@ki.se); [asif.johar@ki.se](mailto:asif.johar@ki.se);  
33  
34 [anna.wikman@ki.se](mailto:anna.wikman@ki.se); [pernilla.lagergren@ki.se](mailto:pernilla.lagergren@ki.se); [jesper.lagergren@ki.se](mailto:jesper.lagergren@ki.se); [rickard.ljung@ki.se](mailto:rickard.ljung@ki.se).  
35

36  
37 **Corresponding author:** Dr. Nele Brusselaers, Unit of Upper Gastrointestinal Research,  
38  
39 Department of Molecular medicine and Surgery, Norra Stationsgatan 67, Level 2, Karolinska  
40  
41 Institutet, SE-171 76 Stockholm, Sweden.

42  
43  
44 Telephone: +46 (0)8 517 709 42. Fax: +46 (0)8 517 709 42. E-mail: [nele.brusselaers@ki.se](mailto:nele.brusselaers@ki.se)  
45  
46  
47  
48  
49

50 **Word count:** 1600  
51  
52  
53  
54  
55  
56  
57  
58  
59  
60

1  
2  
3 **Abstract** (word count: 250)  
4

5  
6 **Objectives:** A beneficial effect of being married on survival has been shown for several  
7  
8 cancer types, but is unclear for oesophageal cancer. The objective of this study was to clarify  
9  
10 the potential influence of marital status on the overall and disease-specific survival after  
11  
12 curatively intended treatment of oesophageal cancer using a nationwide population-based  
13  
14 design, taking into account the known major prognostic variables.

15  
16  
17 **Design:** Prospective, population-based cohort

18  
19  
20 **Setting:** All Swedish hospitals performing surgery for oesophageal cancer during 2001-2005

21  
22 **Participants:** This study included 90% of all oesophageal or junctional cancer patients who  
23  
24 underwent surgical resection in Sweden in 2001-2005, with follow-up until death or end of  
25  
26 study period (2012).

27  
28 **Primary and secondary outcome measures:** Cox regression was used to estimate associations  
29  
30 between marital status and 5-year overall and disease-specific mortality, expressed as hazard  
31  
32 ratios (HRs) with 95% confidence intervals (CIs), with adjustment for sex, age, tumour stage,  
33  
34 histological type, complications, comorbidities and annual surgeon volume.

35  
36  
37 **Results:** Of all 606 included patients (80.4% male), 55.1% were married, 9.2% remarried,  
38  
39 22.6% previously married, and 13.0% never married. Compared to married patients, never  
40  
41 married (HR 1.02, 95% CI 0.77-1.35), previously married (HR 0.90, 95% CI 0.71-1.15) and  
42  
43 remarried patients (HR 0.79, 95% CI 0.55-1.13) had no increased overall 5-year mortality.  
44  
45 The corresponding HRs for disease-specific survival, and after excluding the initial 90 days of  
46  
47 surgery were similar to the HRs of overall survival.

48  
49  
50 **Conclusions:** This study showed no evidence of a better 5-year survival in married compared  
51  
52 to non-married patients undergoing surgery for oesophageal cancer.  
53  
54  
55  
56  
57  
58  
59  
60

1  
2  
3 **Keywords:** Socioeconomic factors; civil status; health status disparities; prognosis; outcome;  
4  
5 oesophagectomy.  
6  
7

### 8 9 **Strengths and limitations of this study**

10 Patients with oesophageal cancer have a poor prognosis, even those patients eligible for  
11  
12 curative surgery (oesophagectomy).  
13

14 Being married has been shown to be a marker of better survival after cancer in general and of  
15  
16 specific cancer types, but this has not been studied yet for oesophageal cancer.  
17  
18

19 This nationwide population-based study did not find any evidence that marital status  
20  
21 influences long-term survival after oesophagectomy for oesophageal cancer, even after taking  
22  
23 into account the known major prognostic variables.  
24  
25

26 The absence of a clear association between marital status and long-term survival, might be a  
27  
28 false negative result related to the relatively small sample size. Yet, it is also possible that the  
29  
30 beneficial effect of being married is non-existent for oesophageal cancer.  
31  
32

33 The main strength of this study is the population-based design with almost complete  
34  
35 coverage, and complete follow-up of all patients operated in Sweden for oesophageal cancer  
36  
37 in 2001-2005. Moreover, complete data on a large variety of variables enabled adjustment for  
38  
39 known prognostic factors. Yet, among limitations are that influence of other confounders or  
40  
41 residual confounding by the variables adjusted for, can never be ruled out. The statistical  
42  
43 power was however limited to detect weak associations.  
44  
45  
46  
47  
48

49 **Acknowledgements:** This work was supported by the Swedish Research Council (SIMSAM)  
50  
51 and the Swedish Cancer Society (Contract number: 13 0537).  
52  
53  
54  
55  
56  
57  
58  
59  
60

1  
2  
3 **Competing interests:** The authors declare that they have no conflict of interest. The Swedish  
4  
5 Research Council (SIMSAM) and the Swedish Cancer Society, the funding sources had no  
6  
7 role in the design and conduct of the study, collection, management, analysis and  
8  
9 interpretation of the data, or preparation review or approval of the manuscript.  
10

11  
12 **Data sharing statement:** There is no additional data available  
13  
14  
15  
16  
17  
18  
19  
20  
21  
22  
23  
24  
25  
26  
27  
28  
29  
30  
31  
32  
33  
34  
35  
36  
37  
38  
39  
40  
41  
42  
43  
44  
45  
46  
47  
48  
49  
50  
51  
52  
53  
54  
55  
56  
57  
58  
59  
60

For peer review only

## Introduction

The potential influence of marital status on health and life expectancy has since long been a matter of discussion.<sup>1 2</sup> Being married has been shown to be a marker of better survival after cancer in general and of specific cancer types,<sup>3</sup> and the survival discrepancy between married and non-married cancer patients has been claimed to be increasing over time.<sup>4</sup> Having a partner is believed to lead to a healthier lifestyle, e.g. regarding tobacco and alcohol use, physical activity, and social support, and can also influence the choice and adherence to treatment, as well as the time elapsing between early symptoms and a confirmed cancer diagnosis.<sup>2</sup> However, little is known about such influence on oesophageal cancer. Only a few studies have investigated the potential role of socio-economic factors in the prognosis of oesophageal cancer.<sup>5 6</sup> A previous study from our group showed limited evidence of an association between lower education and worse long-term survival in operated patients with oesophageal cancer (only significant increase in patients with tumour stage IV).<sup>7</sup> A recent American study showed that married patients were more likely to be diagnosed with localised disease, and received treatment with curative intent more frequently than non-married patients, also showing a better overall survival.<sup>8</sup> However, patients with oesophageal cancer have an overall very poor prognosis, mainly due to advanced tumour at the time of diagnosis, and only a minority is eligible for curatively intended treatment.<sup>9</sup> Surgery (oesophagectomy) is the cornerstone in radical therapy, and is often combined with oncological therapy.<sup>9</sup> The objective of this study was to clarify the potential influence of marital status on the overall and disease-specific survival after curatively intended treatment of oesophageal cancer using a nationwide population-based design, taking into account the known major prognostic variables.

## Methods

### *Participants*

This was a population-based prospective cohort study, which included 90% of all patients with oesophageal or gastroesophageal junctional cancer treated with surgery in Sweden during the period April 2, 2001 and December 31, 2005. Follow-up for survival ended in August 31, 2012. From the full study cohort of 616 patients, 10 patients were excluded because of missing values for marital status, leaving 606 patients for final analysis.

The study was approved by the Regional Ethical Review Board in Stockholm, Sweden.

Informed consent was obtained from each patient before inclusion in the study.

### *Data sources*

The organization of the comprehensive nationwide network of clinicians that participated in the data collection has been described elsewhere, and most parts of the design of this clinical cohort study has been presented in detail.<sup>10 11</sup> In brief, information about tumour stage, histology and localization, surgical procedures and complications were prospectively collected for all patients through scrutiny of relevant medical records from 174 hospital departments in Sweden.<sup>11</sup> In September 2012, the cohort was linked to the Patient Register, the Causes of Death Register, and the Longitudinal Integration Database for Health Insurance and Labour Market Studies (LISA). The Patient Register includes all in-hospital care and outpatient specialist care in Sweden, including codes for diagnoses, surgical procedures and comorbidity with a high level of validity.<sup>12</sup> The Causes of Death Register contains information on date and cause of death for all deceased Swedish residents since 1952.<sup>13</sup> The LISA came into use in 1990 and includes a large variety of variables, including socio-economic status, marital status and work history.<sup>14</sup>

### *Study exposure and outcome*

Four mutually exclusive categories for marital status during the calendar year before surgery were: married (never divorced or widowed), remarried (after widowhood or divorce), previously married (widowed or divorced), and never married. The main outcome measure was overall mortality (including all causes of death) up to 5 years after oesophagectomy for oesophageal cancer. Other outcomes were mortality within 5 years after surgery: 1) after exclusion of deaths within first 90 days of surgery (defined as conditional mortality), 2) with oesophageal cancer as an underlying or contributing cause of death (disease-specific mortality, or death related to oesophageal cancer), and 3) the combination of conditional and disease-specific mortality.

### *Statistical analyses*

The association between marital status and mortality was analysed by means of multivariable Cox regression and expressed as hazard ratios (HRs) with 95% confidence intervals (CIs). The married group was used as reference category. Three regression models were employed: 1) without any adjustments (crude model), 2) adjusted for sex, age and tumour stage (basic model), and 3) further adjusted for histological tumour type, major complications, comorbidities and annual surgeon volume of oesophagectomy for cancer (fully adjusted model)<sup>15</sup>. Due to the limited effect on survival, as shown in a previous study,<sup>7</sup> educational level was not included in the analyses. Age was categorised as <60, 60-74, or ≥75 years, and tumour stage as 0-I, II, III, or IV<sup>16</sup>. Histological type was subdivided in adenocarcinoma and squamous cell carcinoma. Number of major complications (within 30 days of surgery) and comorbidities were both categorised as none, one or more than one, as described previously.<sup>11 17</sup> Surgeon volume was categorised into two equally sized groups based on the median annual number of oesophagectomies per surgeon (<8 or ≥8).<sup>15</sup> To assess effect modification, stratified survival analyses were performed for

1  
2  
3 tumour stage and histological type using the same regression models, without adjustment for the  
4  
5 stratifying variable.  
6  
7

## 10 **Results**

### 12 *Patients*

14 Characteristics of the 606 study patients are described in Table 1. At the time of surgery, 334  
15 patients were married (55.1%), 56 were remarried (9.2%), 137 were married previously  
16 (22.6%), and 79 patients were never married (13.0%). Compared to the married group, the re-  
17 married and never married groups were younger (Table 1). The largest proportion of male  
18 patients was found in the never married group (87.3%) and the smallest in the previously  
19 married group (75.2%). Tumours were as likely to be of an advanced stage (stage IV) in all  
20 four groups (range 10.2-12.0%), but fewer early tumours (stage I) were found in the never  
21 married group (12.7%) compared to the married group (20.7%). Squamous cell carcinoma  
22 was found more frequently in the previously married (29.9%) and never married groups  
23 (30.4%), compared to the married (21.3%) and remarried group (23.2%). Of all patients, 53.6-  
24 62.8% had co-morbidity at time of surgery, which was least in the remarried group. Married  
25 patients were least likely to have been operated on by surgeons with a low annual volume,  
26 compared to previously married patients (49.4% versus 58.4%). There were post-operative  
27 complications in 35.6-41.8% of the patients. In total, 455 (75.1%) patients died within 5 years  
28 of surgery, of whom 429 (94.3%) had oesophageal cancer as an underlying or contributing  
29 cause of death.  
30  
31  
32  
33  
34  
35  
36  
37  
38  
39  
40  
41  
42  
43  
44  
45  
46  
47  
48  
49  
50  
51  
52  
53  
54  
55  
56  
57  
58  
59  
60

### *Marital status and mortality*

The proportions of overall and conditional 5-year mortality were highest in the never married group (Table 1). The absolute 5-year survival rates for married, remarried, previously married, and never married patients were 25.7%, 37.5%, 22.6%, and 16.5% respectively.

Short-term mortality was slightly lower in the never married group (6.3% versus 8.1-8.9% in the other groups) (Table 1). The HRs for mortality after oesophagectomy according to marital status are presented in Table 2. Compared with the married group, no increased HRs of mortality were found in the other marital status groups. The fully adjusted HR of overall 5-year mortality was similar in never married patients compared to married patients (HR 1.02, 95% CI 0.77-1.35), and the corresponding HRs were very similar for disease-specific survival and survival after excluding the initial 90 days after surgery (Table 2). The fully adjusted HR for the various definitions of 5-year mortality was lower in the remarried group (HR ranging from 0.74 to 0.80) and in the previously married group (HR ranging from 0.90 to 0.94), but no statistically significant associations were identified (Table 2). The results for disease-specific survival, and for overall or disease-specific survival after excluding the initial 90 days of surgery, were all similar to the HRs of overall survival (Table 2).

The fully adjusted subgroup analyses for all-cause and disease-specific mortality by tumour stage and histological type showed similar results as the main analyses, and no statistically significant associations were identified (data not shown).

## Discussion

This study did not show any improved survival among married oesophageal cancer patients undergoing oesophagectomy compared to other marital status groups after adjustment for several prognostic variables.

The main strength of this study is the population-based design with almost complete coverage, and complete follow-up of all patients operated in Sweden for oesophageal cancer in 2001-2005. Moreover, complete data on a large variety of variables enabled adjustment for known prognostic factors. Yet, among limitations are that influence of other confounders or residual confounding by the variables adjusted for, can never be ruled out. The statistical power was limited to detect weak associations. Changes in marital status after surgery were considered of limited impact on the results, since these only occurred in 3.3% of all patients. Moreover, we did not have data on co-habiting without being married, or extent of social networks, which could have led to an underestimation of potential associations. Despite the multi-centre design, differences between hospitals and treatment are unlikely to have influenced any associations between marital status and survival.

The absence of a clear association between marital status and long-term survival, such as found for some other cancer types and oesophageal cancer in the large American study mentioned earlier (including all diagnosed patients),<sup>3 8</sup> might be a false negative result related to the relatively small sample size. Yet, it is also possible that the beneficial effect of being married is non-existent for oesophageal cancer receiving surgery, which has a limited chance of survival despite its curative intent.<sup>9</sup> To conclude, this study showed no evidence of improved survival of married compared to non-married patients after having undergone surgery for oesophageal cancer.

## List of abbreviations

CI: confidence interval

HR: hazard ratio

LISA: Longitudinal Integration Database for Health Insurance and Labour Market Studies

**Authors' contributions:** All authors have made substantial contributions to conception and design of the article, JL and PL have been responsible for the acquisition of the data, the statistical analyses and interpretation of the data were performed by NB, FM and AJ; 2) NB has drafted the manuscript, and all authors revised it critically for important intellectual content; and 3) all authors have given final approval of the version to be published.

## References

1. Berkson J. Mortality and marital status. Reflections on the derivation of etiology from statistics. *Am J Public Health Nations Health* 1962;52:1318-29.
2. Rendall MS, Weden MM, Favreault MM, Waldron H. The protective effect of marriage for survival: a review and update. *Demography* 2011;48(2):481-506.
3. Bailey J. Effects of marital status on cancer incidence and survival rates. *Am Fam Physician* 2009;80(10):1052; author reply 52.
4. Kravdal H, Syse A. Changes over time in the effect of marital status on cancer survival. *BMC Public Health* 2011;11:804.

- 1  
2  
3 5. Thrift AP, Nagle CM, Fahey PP, Smithers BM, Watson DI, Whiteman DC.  
4  
5 Predictors of survival among patients diagnosed with adenocarcinoma of the  
6  
7 esophagus and gastroesophageal junction. *Cancer Causes Control* 2012;23(4):555-64.  
8
- 9  
10 6. Gossage JA, Forshaw MJ, Khan AA, Mak V, Moller H, Mason RC. The effect of  
11  
12 economic deprivation on oesophageal and gastric cancer in a UK cancer network. *Int J*  
13  
14 *Clin Pract* 2009;63(6):859-64.  
15
- 16  
17 7. Brusselaers N, Ljung R, Mattsson F, Johar A, Wikman A, Lagergren P, et al.  
18  
19 Education level and survival after oesophageal cancer surgery: a prospective  
20  
21 population-based cohort study. *BMJ Open* 2013;3(12):e003754.  
22
- 23  
24 8. Aizer AA, Chen MH, McCarthy EP, Mendu ML, Koo S, Wilhite TJ, et al. Marital  
25  
26 status and survival in patients with cancer. *J Clin Oncol* 2013;31(31):3869-76.  
27
- 28  
29 9. Lagergren J, Lagergren P. Recent developments in esophageal adenocarcinoma. *CA*  
30  
31 *Cancer J Clin* 2013;63(4):232-48.  
32
- 33  
34 10. Lagergren J, Bergström R, Lindgren A, Nyrén O. Symptomatic gastroesophageal  
35  
36 reflux as a risk factor for esophageal adenocarcinoma. *N Engl J Med*  
37  
38 1999;340(11):825-31.  
39
- 40  
41 11. Viklund P, Lindblad M, Lu M, Ye W, Johansson J, Lagergren J. Risk factors for  
42  
43 complications after esophageal cancer resection: a prospective population-based study  
44  
45 in Sweden. *Ann Surg* 2006;243(2):204-11.  
46
- 47  
48 12. Lagergren K, Derogar M. Validation of oesophageal cancer surgery data in the  
49  
50 Swedish Patient Registry. *Acta Oncol* 2012;51(1):65-8.  
51
- 52  
53 13. Johansson LA, Westerling R. Comparing Swedish hospital discharge records with  
54  
55 death certificates: implications for mortality statistics. *Int J Epidemiol* 2000;29(3):495-  
56  
57 502.  
58  
59  
60

- 1  
2  
3 14. Statistics-Sweden. Longitudinell integrationsdatabas för Sjukförsäkrings- och  
4  
5 Arbetsmarknadsstudier (LISA) 1990–2009, 2011.  
6  
7 15. Brusselaers N, Mattsson F, Lagergren J. Hospital and surgeon volume in relation  
8  
9 to long-term survival after oesophagectomy: systematic review and meta-analysis. *Gut*  
10  
11 2013.  
12  
13 16. Sobin L, Wittekind C. *International Union Against Cancer (UICC): Classification*  
14  
15 *of malignant tumours*. 6th ed, 2002.  
16  
17 17. Backemar L, Djärv T, Wikman A, Johar A, Ross P, Lagergren P, et al. The role of  
18  
19 diabetes and other co-morbidities on survival after esophageal cancer surgery in a  
20  
21 population-based study. *Am J Surg* 2013;doi: 10.1016/j.amjsurg.2013.01.035.  
22  
23  
24  
25  
26  
27  
28  
29  
30  
31  
32  
33  
34  
35  
36  
37  
38  
39  
40  
41  
42  
43  
44  
45  
46  
47  
48  
49  
50  
51  
52  
53  
54  
55  
56  
57  
58  
59  
60

**Table 1: Demographic, treatment, and tumour characteristics and mortality after oesophagectomy for cancer, categorised by marital status at the time of diagnosis.**

|                                     | Marital status |                  |                            |                      | Total        |
|-------------------------------------|----------------|------------------|----------------------------|----------------------|--------------|
|                                     | <i>Married</i> | <i>Remarried</i> | <i>Previously Married*</i> | <i>Never married</i> |              |
|                                     | <i>N (%)</i>   | <i>N (%)</i>     | <i>N (%)</i>               | <i>N (%)</i>         | <i>N (%)</i> |
| <b>Total</b>                        | 334 (55.1)     | 56 (9.2)         | 137 (22.6)                 | 79 (13.0)            | 606 (100.0)  |
| <b>Age</b>                          |                |                  |                            |                      |              |
| <60 years                           | 63 (18.9)      | 18 (32.1)        | 31 (22.6)                  | 33 (41.8)            | 145 (23.9)   |
| 60-74 years                         | 199 (59.6)     | 34 (60.7)        | 69 (50.4)                  | 37 (46.8)            | 339 (55.9)   |
| ≥75 years                           | 72 (21.6)      | 4 (7.1)          | 37 (27.0)                  | 9 (11.4)             | 122 (20.1)   |
| <b>Sex</b>                          |                |                  |                            |                      |              |
| Male                                | 270 (80.8)     | 45 (80.4)        | 103 (75.2)                 | 69 (87.3)            | 487 (80.4)   |
| Female                              | 64 (19.2)      | 11 (19.6)        | 34 (24.8)                  | 10 (12.7)            | 119 (19.6)   |
| <b>Tumour stage</b>                 |                |                  |                            |                      |              |
| 0-I                                 | 69 (20.7)      | 12 (21.4)        | 23 (16.8)                  | 10 (12.7)            | 114 (18.8)   |
| II                                  | 100 (29.9)     | 12 (21.4)        | 42 (30.7)                  | 24 (30.4)            | 178 (29.4)   |
| III                                 | 125 (37.4)     | 26 (46.4)        | 58 (42.3)                  | 36 (45.6)            | 245 (40.4)   |
| IV                                  | 40 (12.0)      | 6 (10.7)         | 14 (10.2)                  | 9 (11.4)             | 69 (11.4)    |
| <b>Histology</b>                    |                |                  |                            |                      |              |
| Adenocarcinoma                      | 263 (78.7)     | 43 (76.8)        | 96 (70.1)                  | 55 (69.6)            | 457 (75.4)   |
| Squamous cell carcinoma             | 71 (21.3)      | 13 (23.2)        | 41 (29.9)                  | 24 (30.4)            | 149 (24.6)   |
| <b>Co-morbidity</b>                 |                |                  |                            |                      |              |
| None                                | 126 (37.7)     | 26 (46.4)        | 51 (37.2)                  | 33 (41.8)            | 236 (38.9)   |
| One                                 | 117 (35.0)     | 21 (37.5)        | 49 (35.8)                  | 25 (31.7)            | 212 (35.0)   |
| More than one                       | 91 (27.3)      | 9 (16.1)         | 37 (27.0)                  | 21 (26.6)            | 158 (26.1)   |
| <b>Surgical volume</b>              |                |                  |                            |                      |              |
| Low (<8 operations/year)            | 165 (49.4)     | 30 (53.6)        | 80 (58.4)                  | 43 (54.4)            | 318 (52.5)   |
| High (≥8 operations/year)           | 169 (50.6)     | 26 (46.4)        | 57 (41.6)                  | 36 (45.6)            | 288 (47.5)   |
| <b>Post-operative complications</b> |                |                  |                            |                      |              |
| None                                | 215 (64.4)     | 35 (62.5)        | 85 (62.0)                  | 46 (58.2)            | 381 (62.9)   |
| One                                 | 85 (25.5)      | 14 (25.0)        | 28 (20.4)                  | 17 (21.5)            | 144 (23.8)   |
| More than one                       | 34 (10.2)      | 7 (12.5)         | 24 (17.5)                  | 16 (20.3)            | 81 (13.4)    |
| <b>Mortality, 90 days</b>           |                |                  |                            |                      |              |
| Within 90 days                      | 27 (8.1)       | 5 (8.9)          | 11 (8.0)                   | 5 (6.3)              | 48 (7.9)     |
| Overall within 5 years              | 248 (74.3)     | 35 (62.5)        | 106 (77.4)                 | 66 (83.5)            | 455 (75.1)   |
| Conditional within 5 years**        | 221 (72.0)     | 30 (58.8)        | 95 (75.4)                  | 61 (82.4)            | 407 (72.9)   |

\*Previously married was defined as patients who have been married before but are living alone (after death of partner or divorce). \*\*Conditional mortality: excluding first 90 days after surgery.

**Table 2: Multi-variable Cox regression models analysing the association between marital status at the time of diagnosis and mortality after oesophagectomy for cancer, expressed as hazard ratios (HR) with 95% confidence intervals (CI).**

|                                                                               | Marital status                 |                                  |                                                |                                      |
|-------------------------------------------------------------------------------|--------------------------------|----------------------------------|------------------------------------------------|--------------------------------------|
|                                                                               | <i>Married<br/>(Reference)</i> | <i>Remarried<br/>HR (95% CI)</i> | <i>Previously<br/>married*<br/>HR (95% CI)</i> | <i>Never married<br/>HR (95% CI)</i> |
| <b>Overall 5-year mortality</b>                                               |                                |                                  |                                                |                                      |
| <i>Model 1</i>                                                                | 1                              | 0.77 (0.54-1.10)                 | 1.09 (0.87-1.37)                               | 1.14 (0.87-1.49)                     |
| <i>Model 2</i>                                                                | 1                              | 0.79 (0.55-1.13)                 | 0.95 (0.75-1.20)                               | 1.03 (0.78-1.36)                     |
| <i>Model 3</i>                                                                | 1                              | 0.79 (0.55-1.13)                 | 0.90 (0.71-1.15)                               | 1.02 (0.77-1.35)                     |
| <b>Conditional<sup>a</sup> overall 5-year mortality</b>                       |                                |                                  |                                                |                                      |
| <i>Model 1</i>                                                                | 1                              | 0.73 (0.50-1.07)                 | 1.11 (0.87-1.41)                               | 1.18 (0.89-1.57)                     |
| <i>Model 2</i>                                                                | 1                              | 0.73 (0.50-1.08)                 | 0.96 (0.75-1.23)                               | 1.04 (0.78-1.38)                     |
| <i>Model 3</i>                                                                | 1                              | 0.74 (0.50-1.08)                 | 0.93 (0.72-1.20)                               | 1.05 (0.78-1.41)                     |
| <b>Disease-specific<sup>b</sup> 5-year mortality</b>                          |                                |                                  |                                                |                                      |
| <i>Model 1</i>                                                                | 1                              | 0.79 (0.56-1.13)                 | 1.11 (0.88-1.40)                               | 1.19 (0.89-1.57)                     |
| <i>Model 2</i>                                                                | 1                              | 0.80 (0.56-1.15)                 | 0.96 (0.76-1.22)                               | 1.03 (0.77-1.34)                     |
| <i>Model 3</i>                                                                | 1                              | 0.80 (0.56-1.15)                 | 0.92 (0.72-1.17)                               | 1.04 (0.78-1.39)                     |
| <b>Conditional<sup>a</sup> disease- specific<sup>b</sup> 5-year mortality</b> |                                |                                  |                                                |                                      |
| <i>Model 1</i>                                                                | 1                              | 0.75 (0.51-1.10)                 | 1.12 (0.87-1.43)                               | 1.21 (0.90-1.63)                     |
| <i>Model 2</i>                                                                | 1                              | 0.74 (0.50-1.09)                 | 0.97 (0.76-1.25)                               | 1.02 (0.76-1.38)                     |
| <i>Model 3</i>                                                                | 1                              | 0.74 (0.51-1.10)                 | 0.94 (0.73-1.22)                               | 1.05 (0.78-1.42)                     |

Values are expressed as hazard ratios (HR). \*Previously married was defined as patients who have been married before but are living alone (after death of partner or divorce). <sup>a</sup>Conditional mortality: excluding first 90 days after surgery. <sup>b</sup>Disease-specific mortality: oesophageal or junctional cancer as underlying or contributing cause. Model 1: unadjusted. Model 2: adjusted for sex, age, tumour stage. Model 3: adjusted for sex, age, tumour stage, histology, major complications, comorbidity and surgeon volume.

**STROBE 2007 (v4) checklist of items to be included in reports of observational studies in epidemiology\***  
**Checklist for cohort, case-control, and cross-sectional studies (combined)**

| Section/Topic             | Item # | Recommendation                                                                                                                                                                                                                                                                                                                                                                                                                                                         | Reported on page # |
|---------------------------|--------|------------------------------------------------------------------------------------------------------------------------------------------------------------------------------------------------------------------------------------------------------------------------------------------------------------------------------------------------------------------------------------------------------------------------------------------------------------------------|--------------------|
| Title and abstract        | 1      | (a) Indicate the study's design with a commonly used term in the title or the abstract                                                                                                                                                                                                                                                                                                                                                                                 | 1,2                |
|                           |        | (b) Provide in the abstract an informative and balanced summary of what was done and what was found                                                                                                                                                                                                                                                                                                                                                                    | 2                  |
| <b>Introduction</b>       |        |                                                                                                                                                                                                                                                                                                                                                                                                                                                                        |                    |
| Background/rationale      | 2      | Explain the scientific background and rationale for the investigation being reported                                                                                                                                                                                                                                                                                                                                                                                   | 5                  |
| Objectives                | 3      | State specific objectives, including any pre-specified hypotheses                                                                                                                                                                                                                                                                                                                                                                                                      | 5                  |
| <b>Methods</b>            |        |                                                                                                                                                                                                                                                                                                                                                                                                                                                                        |                    |
| Study design              | 4      | Present key elements of study design early in the paper                                                                                                                                                                                                                                                                                                                                                                                                                | 6,7                |
| Setting                   | 5      | Describe the setting, locations, and relevant dates, including periods of recruitment, exposure, follow-up, and data collection                                                                                                                                                                                                                                                                                                                                        | 6,7                |
| Participants              | 6      | (a) <i>Cohort study</i> —Give the eligibility criteria, and the sources and methods of selection of participants. Describe methods of follow-up<br><i>Case-control study</i> —Give the eligibility criteria, and the sources and methods of case ascertainment and control selection. Give the rationale for the choice of cases and controls<br><i>Cross-sectional study</i> —Give the eligibility criteria, and the sources and methods of selection of participants | 6,7                |
|                           |        | (b) <i>Cohort study</i> —For matched studies, give matching criteria and number of exposed and unexposed<br><i>Case-control study</i> —For matched studies, give matching criteria and the number of controls per case                                                                                                                                                                                                                                                 |                    |
| Variables                 | 7      | Clearly define all outcomes, exposures, predictors, potential confounders, and effect modifiers. Give diagnostic criteria, if applicable                                                                                                                                                                                                                                                                                                                               | 6,7                |
| Data sources/ measurement | 8*     | For each variable of interest, give sources of data and details of methods of assessment (measurement). Describe comparability of assessment methods if there is more than one group                                                                                                                                                                                                                                                                                   | 6,7                |
| Bias                      | 9      | Describe any efforts to address potential sources of bias                                                                                                                                                                                                                                                                                                                                                                                                              | 6,7                |
| Study size                | 10     | Explain how the study size was arrived at                                                                                                                                                                                                                                                                                                                                                                                                                              | 6,7                |
| Quantitative variables    | 11     | Explain how quantitative variables were handled in the analyses. If applicable, describe which groupings were chosen and why                                                                                                                                                                                                                                                                                                                                           | 7                  |
| Statistical methods       | 12     | (a) Describe all statistical methods, including those used to control for confounding                                                                                                                                                                                                                                                                                                                                                                                  | 7                  |
|                           |        | (b) Describe any methods used to examine subgroups and interactions                                                                                                                                                                                                                                                                                                                                                                                                    | 7                  |
|                           |        | (c) Explain how missing data were addressed                                                                                                                                                                                                                                                                                                                                                                                                                            | 7                  |
|                           |        | (d) <i>Cohort study</i> —If applicable, explain how loss to follow-up was addressed<br><i>Case-control study</i> —If applicable, explain how matching of cases and controls was addressed                                                                                                                                                                                                                                                                              | 7                  |

|                          |     |                                                                                                                                                                                                              |            |
|--------------------------|-----|--------------------------------------------------------------------------------------------------------------------------------------------------------------------------------------------------------------|------------|
|                          |     | <i>Cross-sectional study</i> —If applicable, describe analytical methods taking account of sampling strategy                                                                                                 |            |
|                          |     | (e) Describe any sensitivity analyses                                                                                                                                                                        | -          |
| <b>Results</b>           |     |                                                                                                                                                                                                              |            |
| Participants             | 13* | (a) Report numbers of individuals at each stage of study—eg numbers potentially eligible, examined for eligibility, confirmed eligible, included in the study, completing follow-up, and analysed            | 8          |
|                          |     | (b) Give reasons for non-participation at each stage                                                                                                                                                         | -          |
|                          |     | (c) Consider use of a flow diagram                                                                                                                                                                           | -          |
| Descriptive data         | 14* | (a) Give characteristics of study participants (eg demographic, clinical, social) and information on exposures and potential confounders                                                                     | 8          |
|                          |     | (b) Indicate number of participants with missing data for each variable of interest                                                                                                                          | 8          |
|                          |     | (c) <i>Cohort study</i> —Summarise follow-up time (eg, average and total amount)                                                                                                                             | 6, 8       |
| Outcome data             | 15* | <i>Cohort study</i> —Report numbers of outcome events or summary measures over time                                                                                                                          | 9, Table 1 |
|                          |     | <i>Case-control study</i> —Report numbers in each exposure category, or summary measures of exposure                                                                                                         | -          |
|                          |     | <i>Cross-sectional study</i> —Report numbers of outcome events or summary measures                                                                                                                           | -          |
| Main results             | 16  | (a) Give unadjusted estimates and, if applicable, confounder-adjusted estimates and their precision (eg, 95% confidence interval). Make clear which confounders were adjusted for and why they were included | 9, Table 2 |
|                          |     | (b) Report category boundaries when continuous variables were categorized                                                                                                                                    | -          |
|                          |     | (c) If relevant, consider translating estimates of relative risk into absolute risk for a meaningful time period                                                                                             | -          |
| Other analyses           | 17  | Report other analyses done—eg analyses of subgroups and interactions, and sensitivity analyses                                                                                                               | 9          |
| <b>Discussion</b>        |     |                                                                                                                                                                                                              |            |
| Key results              | 18  | Summarise key results with reference to study objectives                                                                                                                                                     | 10         |
| Limitations              | 19  | Discuss limitations of the study, taking into account sources of potential bias or imprecision. Discuss both direction and magnitude of any potential bias                                                   | 10         |
| Interpretation           | 20  | Give a cautious overall interpretation of results considering objectives, limitations, multiplicity of analyses, results from similar studies, and other relevant evidence                                   | 10         |
| Generalisability         | 21  | Discuss the generalisability (external validity) of the study results                                                                                                                                        | 10         |
| <b>Other information</b> |     |                                                                                                                                                                                                              |            |
| Funding                  | 22  | Give the source of funding and the role of the funders for the present study and, if applicable, for the original study on which the present article is based                                                | 3-4        |

\*Give information separately for cases and controls in case-control studies and, if applicable, for exposed and unexposed groups in cohort and cross-sectional studies.

**Note:** An Explanation and Elaboration article discusses each checklist item and gives methodological background and published examples of transparent reporting. The STROBE checklist is best used in conjunction with this article (freely available on the Web sites of PLoS Medicine at <http://www.plosmedicine.org/>, Annals of Internal Medicine at <http://www.annals.org/>, and Epidemiology at <http://www.epidem.com/>). Information on the STROBE Initiative is available at [www.strobe-statement.org](http://www.strobe-statement.org).

## STUDY PROTOCOL

### Project title:

Marital status in relation to 5-year survival after oesophageal cancer surgery (SECC)

### Collaborators (in alphabetic order)

Anna, Asif, Fredrik, Jesper (last author), Nele (first author), Pernilla, Rickard.

### Objectives

To clarify the potential effects of the socio-economic factor marital status and changes of marital status on the overall survival within 5 years after oesophageal cancer surgery, using the SECC database linked to the LISA-registry.

### Background

In some studies, marital status and patient's partner's level of education has influenced choice of, and adherence to, treatment [1-3]. Little is known about the specific impact of marital status on the outcome after oesophageal cancer surgery. Several studies have explored determinants on short-term survival (in-hospital or 30-days), after oesophageal cancer *diagnosis* [4-10]. Other studies have investigated determinants for long-term survival after oesophageal cancer *surgery* [11-15], but most of these prognostic studies focused on clinical and tumor-related characteristics. Only a minority of these studies included determinants used to describe the socio-economic status of the patient (e.g. ethnicity, marital status, education status, smoking, and 'deprived' socio-economic status) [4, 10, 12, 16-19]. Taken together, surprisingly little is known about the specific impact of marital status on survival after oesophageal cancer surgery.

### Methods

#### *Data collection*

The following databases are linked and will be used:

- SECC-database (Swedish Esophageal and Cardia Cancer database): an all-encompassing, nationwide research database that includes almost all esophageal and cardia cancer patients in Sweden treated with surgery. SECC contains detailed patient file-based information about tumor pathology and localization, TNM stage, surgical procedures, techniques and complications, and additionally contains repeated health-related quality of life (HRQL) assessments and clinical (prognostic)

factors such as BMI. The SECC register was initiated in April 2001 and since then until December 2005 about 90% of all surgically treated esophageal cancer patients are included. The almost complete national coverage and the detailed prospective data collection and objective manual review of each case ensure a good validity. The patients are followed up at least 5 years for survival (up to 2012).

- LISA-registry: includes data on marital status and changes in such status.
- The Causes of Death Registry: includes dates and underlying causes of all deaths among persons residing in the country, independently of where they died (including abroad). Only a small number of deaths do not have a recorded cause of death, e.g. 0.5% in Sweden. This enables us to study disease-specific mortality.
- Patient Registry: will be used to collect data on comorbidities based on discharge diagnoses, surgical procedures, and hospitalisation dates. The Swedish Patient Registry was 85% complete in 1983 and 100% in 1987 and onwards. The Patient Registry provides us with possibilities to better adjust the results for comorbidities.

### *Study design*

This prospective population-based cohort study will be based on the SECC registry (N=616), of patients who underwent oesophageal resection in April 2001 to December 2005, and followed up for 5 years. The specific impact of marital status on long-term survival after surgery will be evaluated.

The data from the available registries will be used for each cohort member, including comorbidities, operations, cancer, date of death, cause of death, etc.

### *Study exposures*

- Marital status one calendar year before surgery: based on registered marriages; divided in 4 groups (based on data since 1968 and onwards):
  - i. "Never married",
  - ii. "Married" (= no divorces/never widow),
  - iii. "Remarried" (thus previously divorced or widowed),
  - iv. "Living as single but married before" (thus previously divorced or widowed).
- Dynamic changes after operation: possible second time-point to measure exposure - If important changes between operation and death/end of 5y follow-up: re-evaluate time-point of exposure.

### *Study outcome*

- 1) Overall mortality up to 5 years after oesophagectomy for oesophageal or cardia cancer.
- 2) Overall mortality up to 5 years after oesophagectomy for oesophageal or cardia cancer, after exclusion of the first 90 days after surgery.

- 3) Disease-specific mortality up to 5 years after oesophagectomy for oesophageal or cardia cancer.
- 4) Disease-specific mortality up to 5 years after oesophagectomy for oesophageal or cardia cancer, after exclusion of the first 90 days after surgery.
- 5) Potential outcome: 90-days overall mortality after oesophagectomy for oesophageal or cardia cancer (possible power problem)

The last surgical resections were performed in 2005, so all patients have sufficiently long follow-up.

#### *Most important possible confounders*

- (1) Tumour stage: based on TNM classification (categorised in 4 groups: 0-I; II, and III, IV. Stage III=T3N1 is largest group  $\pm 60\%$ ),
- (2) Comorbidities: combined in 3 groups: none – one –more than one; or 2 groups if insufficient statistical power; 6 possible comorbidities: diabetes, cardiovascular disease, pulmonary disease, liver disease, renal failure, other cancer. Data should be complete (not reported = none), but patients can have more than 1 co-morbidity. In former SECC studies hypertension and “other” were also reported, but will not be included in this binary variable.
- (3) Age (at surgery): 3 groups: <60y, 60-74y, +75y or continuous.
- (4) Sex (adjustment might lead to power problem; only 20% female)
- (5) Histological type (adenocarcinoma - 76% or squamous cell carcinoma – 24%),
- (6) Complications (surgical or medical; combined in 3 groups: none – one –more than one; or 2 groups if insufficient statistical power. In SECC database: 9 types of surgical complications and 10 medical) (Not in 90 days survival)
- (7) Education (depending on SECC study Education)
- (8) Surgery volume: 2 equal sized groups

#### *Statistical analyses*

The adjusted associations between marital status and survival after oesophageal cancer surgery will be analysed by means of multivariable Cox regression analyses (hazard ratio's) with 95% confidence intervals.

Kaplan-Meier method will be used to present mortality, and comparison between survival curves in various exposure groups will be tested with the log-rank test.

Interaction analysis or separate stratified analysis will be conducted for patients with tumour stage III, histological type (possibly not presented in study) and sex.

Three models will be used:

- Model 1: crude model
- Model 2: age, sex, TNM,
- Model 3: all variables (except for complications in short term/90d mortality)

## References

1. Jaffe, D.H., et al., *Effects of husbands' and wives' education on each other's mortality*. Soc Sci Med, 2006. **62**(8): p. 2014-23.
2. Berntsen, K.N., *Trends in total and cause-specific mortality by marital status among elderly Norwegian men and women*. BMC Public Health, 2011. **11**: p. 537.
3. Lee, J.A., P.G. Chin, and K.J. Wuthrich, *Relationships in Canada between mortality from tumours of the gastrointestinal tract and marital status*. Can Med Assoc J, 1975. **113**(9): p. 839-43.
4. Morgan, M.A., et al., *Influence of socio-economic deprivation on outcomes for patients diagnosed with oesophageal cancer*. Scand J Gastroenterol, 2007. **42**(10): p. 1230-7.
5. Bergquist, H., et al., *Factors predicting survival in patients with advanced oesophageal cancer: a prospective multicentre evaluation*. Aliment Pharmacol Ther, 2008. **27**(5): p. 385-95.
6. Kii, T., et al., *Evaluation of prognostic factors of esophageal squamous cell carcinoma (stage II-III) after concurrent chemoradiotherapy using biopsy specimens*. Jpn J Clin Oncol, 2007. **37**(8): p. 583-9.
7. Farrow, D.C. and T.L. Vaughan, *Determinants of survival following the diagnosis of esophageal adenocarcinoma (United States)*. Cancer Causes Control, 1996. **7**(3): p. 322-7.
8. Sariego, J., et al., *Prediction of outcome in "resectable" esophageal carcinoma*. J Surg Oncol, 1993. **54**(4): p. 223-5.
9. Steyerberg, E.W., et al., *Surgical mortality in patients with esophageal cancer: development and validation of a simple risk score*. Journal of clinical oncology : official journal of the American Society of Clinical Oncology, 2006. **24**(26): p. 4277-84.
10. Thrift, A.P., et al., *Predictors of survival among patients diagnosed with adenocarcinoma of the esophagus and gastroesophageal junction*. Cancer Causes Control, 2012. **23**(4): p. 555-64.
11. Lagarde, S.M., et al., *Prognostic nomogram for patients undergoing oesophagectomy for adenocarcinoma of the oesophagus or gastro-oesophageal junction*. Br J Surg, 2007. **94**(11): p. 1361-8.
12. Mirinezhad, S.K., et al., *Survival Rate and Prognostic Factors of Esophageal Cancer in East Azerbaijan Province, North-west of Iran*. Asian Pac J Cancer Prev, 2012. **13**(7): p. 3451-4.
13. Hosokawa, Y., et al., *Clinicopathological features and prognostic factors of adenocarcinoma of the esophagogastric junction according to Siewert classification: experiences at a single institution in Japan*. Ann Surg Oncol, 2012. **19**(2): p. 677-83.
14. Stassen, L.P., et al., *Recurrence and survival after resection of adenocarcinoma of the gastric cardia*. Rotterdam Esophageal Tumor Study Group. Dis Esophagus, 2000. **13**(1): p. 32-8.
15. Rouvelas, I., et al., *Survival after surgery for oesophageal cancer: a population-based study*. Lancet Oncol, 2005. **6**(11): p. 864-70.
16. Ra, J., et al., *Postoperative mortality after esophagectomy for cancer: development of a preoperative risk prediction model*. Ann Surg Oncol, 2008. **15**(6): p. 1577-84.
17. Aghcheli, K., et al., *Prognostic factors for esophageal squamous cell carcinoma--a population-based study in Golestan Province, Iran, a high incidence area*. PLoS One, 2011. **6**(7): p. e22152.

- 1
  - 2
  - 3
  - 4
  - 5
  - 6
  - 7
  - 8
  - 9
  - 10
  - 11
  - 12
  - 13
  - 14
  - 15
  - 16
  - 17
  - 18
  - 19
  - 20
  - 21
  - 22
  - 23
  - 24
  - 25
  - 26
  - 27
  - 28
  - 29
  - 30
  - 31
  - 32
  - 33
  - 34
  - 35
  - 36
  - 37
  - 38
  - 39
  - 40
  - 41
  - 42
  - 43
  - 44
  - 45
  - 46
  - 47
  - 48
  - 49
  - 50
  - 51
  - 52
  - 53
  - 54
  - 55
  - 56
  - 57
  - 58
  - 59
  - 60
18. Bashash, M., et al., *The prognostic effect of ethnicity for gastric and esophageal cancer: the population-based experience in British Columbia, Canada*. BMC Cancer, 2011. **11**: p. 164.
19. Gossage, J.A., et al., *The effect of economic deprivation on oesophageal and gastric cancer in a UK cancer network*. Int J Clin Pract, 2009. **63**(6): p. 859-64.

For peer review only

# BMJ Open

## Marital status and survival after oesophageal cancer surgery: A population-based nationwide cohort study in Sweden

|                                 |                                                                                                                                                                                                                                                                                                                                                                                                                                                                                                                                                                                                                                                          |
|---------------------------------|----------------------------------------------------------------------------------------------------------------------------------------------------------------------------------------------------------------------------------------------------------------------------------------------------------------------------------------------------------------------------------------------------------------------------------------------------------------------------------------------------------------------------------------------------------------------------------------------------------------------------------------------------------|
| Journal:                        | <i>BMJ Open</i>                                                                                                                                                                                                                                                                                                                                                                                                                                                                                                                                                                                                                                          |
| Manuscript ID:                  | bmjopen-2014-005418.R1                                                                                                                                                                                                                                                                                                                                                                                                                                                                                                                                                                                                                                   |
| Article Type:                   | Research                                                                                                                                                                                                                                                                                                                                                                                                                                                                                                                                                                                                                                                 |
| Date Submitted by the Author:   | 13-May-2014                                                                                                                                                                                                                                                                                                                                                                                                                                                                                                                                                                                                                                              |
| Complete List of Authors:       | Brusselaers, Nele; Karolinska Institutet, Molecular medicine and Surgery<br>Mattsson, Fredrik; Karolinska Institutet, Upper Gastrointestinal Research, Department of Molecular Medicine and Surgery<br>Johar, Asif; Karolinska Institutet, Upper Gastrointestinal Research, Department of Molecular Medicine and Surgery<br>Wikman, Anna; Karolinska Institute, Molecular Medicine and Surgery<br>Lagergren, Pernilla; Karolinska Institute, Department of Molecular Medicine and Surgery<br>Lagergren, Jesper; King's College London, Division of Cancer Studies<br>Ljung, Rickard; Karolinska Institutet, Department of Molecular Medicine and Surgery |
| <b>Primary Subject Heading</b>: | Oncology                                                                                                                                                                                                                                                                                                                                                                                                                                                                                                                                                                                                                                                 |
| Secondary Subject Heading:      | Epidemiology, Gastroenterology and hepatology, Surgery                                                                                                                                                                                                                                                                                                                                                                                                                                                                                                                                                                                                   |
| Keywords:                       | oesophageal cancer, marital status, survival                                                                                                                                                                                                                                                                                                                                                                                                                                                                                                                                                                                                             |
|                                 |                                                                                                                                                                                                                                                                                                                                                                                                                                                                                                                                                                                                                                                          |

SCHOLARONE™  
Manuscripts

1  
2  
3 **Marital status and survival after oesophageal cancer surgery:**

4  
5  
6 **A population-based nationwide cohort study in Sweden**

7  
8  
9  
10  
11 **Authors:** Nele BRUSSELAERS MD PhD<sup>1</sup>, Fredrik MATTSSON BSc<sup>1</sup>, Asif JOHAR MSc<sup>1</sup>,  
12  
13 Anna WIKMAN PhD<sup>1</sup>, Pernilla LAGERGREN PhD<sup>1</sup>, Jesper LAGERGREN MD PhD<sup>1,2</sup>  
14  
15 Rickard LJUNG MD PhD<sup>1,3</sup>.  
16  
17

18  
19  
20  
21 **Affiliations:** <sup>1</sup>Unit of Upper Gastrointestinal Research, Department of Molecular medicine  
22  
23 and Surgery, Karolinska Institutet, Stockholm, Sweden.

24  
25 <sup>2</sup>Division of Cancer Studies, King's College London, London, United Kingdom.

26  
27 <sup>3</sup>Unit of Epidemiology, Institute of Environmental Medicine, Karolinska Institutet,  
28  
29 Stockholm, Sweden.  
30

31  
32 **Email addresses:** [nele.brusselaers@ki.se](mailto:nele.brusselaers@ki.se); [fredrik.mattsson@ki.se](mailto:fredrik.mattsson@ki.se); [asif.johar@ki.se](mailto:asif.johar@ki.se);  
33  
34 [anna.wikman@ki.se](mailto:anna.wikman@ki.se); [pernilla.lagergren@ki.se](mailto:pernilla.lagergren@ki.se); [jesper.lagergren@ki.se](mailto:jesper.lagergren@ki.se); [rickard.ljung@ki.se](mailto:rickard.ljung@ki.se).  
35

36  
37 **Corresponding author:** Dr. Nele Brusselaers, Unit of Upper Gastrointestinal Research,  
38  
39 Department of Molecular medicine and Surgery, Norra Stationsgatan 67, Level 2, Karolinska  
40  
41 Institutet, SE-171 76 Stockholm, Sweden.  
42

43  
44 Telephone: +46 (0)8 517 709 42. Fax: +46 (0)8 517 709 42. E-mail: [nele.brusselaers@ki.se](mailto:nele.brusselaers@ki.se)  
45  
46  
47  
48

49  
50 **Word count:** 1761  
51  
52  
53  
54  
55  
56  
57  
58  
59  
60

1  
2  
3 **Abstract** (word count: 250)  
4

5  
6 **Objectives:** A beneficial effect of being married on survival has been shown for several  
7  
8 cancer types, but is unclear for oesophageal cancer. The objective of this study was to clarify  
9  
10 the potential influence of marital status on the overall and disease-specific survival after  
11  
12 curatively intended treatment of oesophageal cancer using a nationwide population-based  
13  
14 design, taking into account the known major prognostic variables.

15  
16  
17 **Design:** Prospective, population-based cohort

18  
19  
20 **Setting:** All Swedish hospitals performing surgery for oesophageal cancer during 2001-2005

21  
22 **Participants:** This study included 90% of all oesophageal or junctional cancer patients who  
23  
24 underwent surgical resection in Sweden in 2001-2005, with follow-up until death or end of  
25  
26 study period (2012).

27  
28 **Primary and secondary outcome measures:** Cox regression was used to estimate associations  
29  
30 between marital status and 5-year overall and disease-specific mortality, expressed as hazard  
31  
32 ratios (HRs) with 95% confidence intervals (CIs), with adjustment for sex, age, tumour stage,  
33  
34 histological type, complications, comorbidities and annual surgeon volume.

35  
36  
37 **Results:** Of all 606 included patients (80.4% male), 55.1% were married, 9.2% remarried,  
38  
39 22.6% previously married, and 13.0% never married. Compared to married patients, never  
40  
41 married (HR 1.02, 95% CI 0.77-1.35), previously married (HR 0.90, 95% CI 0.71-1.15) and  
42  
43 remarried patients (HR 0.79, 95% CI 0.55-1.13) had no increased overall 5-year mortality.  
44  
45 The corresponding HRs for disease-specific survival, and after excluding the initial 90 days of  
46  
47 surgery were similar to the HRs of overall survival.

48  
49  
50 **Conclusions:** This study showed no evidence of a better 5-year survival in married compared  
51  
52 to non-married patients undergoing surgery for oesophageal cancer.  
53  
54

1  
2  
3 **Keywords:** Socioeconomic factors; civil status; health status disparities; prognosis; outcome;  
4  
5 oesophagectomy.  
6  
7

### 8 9 **Strengths and limitations of this study**

10 Patients with oesophageal cancer have a poor prognosis, even those patients eligible for  
11  
12 curative surgery (oesophagectomy).  
13

14  
15 Being married has been shown to be a marker of better survival after cancer in general and of  
16  
17 specific cancer types, but this has not been studied yet for oesophageal cancer.  
18  
19

20 This nationwide population-based study did not find any evidence that marital status  
21  
22 influences long-term survival after oesophagectomy for oesophageal cancer, even after taking  
23  
24 into account the known major prognostic variables.  
25  
26

27 The absence of a clear association between marital status and long-term survival, might be a  
28  
29 false negative result related to the relatively small sample size. Yet, it is also possible that the  
30  
31 beneficial effect of being married is non-existent for oesophageal cancer.  
32  
33

34 The main strength of this study is the population-based design with almost complete  
35  
36 coverage, and complete follow-up of all patients operated in Sweden for oesophageal cancer  
37  
38 in 2001-2005. Moreover, complete data on a large variety of variables enabled adjustment for  
39  
40 known prognostic factors. Yet, among limitations are that influence of other confounders or  
41  
42 residual confounding by the variables adjusted for, can never be ruled out. The statistical  
43  
44 power was however limited to detect weak associations.  
45  
46  
47  
48  
49  
50  
51  
52  
53  
54  
55  
56  
57  
58  
59  
60

## Introduction

The potential influence of marital status on health and life expectancy has since long been a matter of discussion.<sup>1 2</sup> Being married has been shown to be a marker of better survival after cancer in general and of specific cancer types,<sup>3</sup> and the survival discrepancy between married and non-married cancer patients has been claimed to be increasing over time.<sup>4</sup> Having a partner is believed to lead to a healthier lifestyle, e.g. regarding tobacco and alcohol use, physical activity, and social support, and can also influence the choice and adherence to treatment, as well as the time elapsing between early symptoms and a confirmed cancer diagnosis.<sup>2</sup> However, little is known about such influence on oesophageal cancer. Only a few studies have investigated the potential role of socio-economic factors in the prognosis of oesophageal cancer.<sup>5 6</sup> A previous study from our group showed limited evidence of an association between lower education and worse long-term survival in operated patients with oesophageal cancer (only significant difference in patients with tumour stage IV).<sup>7</sup> A recent American study showed that married patients were more likely to be diagnosed with localised disease, and received treatment with curative intent more frequently than non-married patients, also showing a better overall survival.<sup>8</sup> However, patients with oesophageal cancer have an overall very poor prognosis, mainly due to advanced tumour at the time of diagnosis, and only a minority is eligible for curatively intended treatment.<sup>9</sup> Surgery (oesophagectomy) plays a main role in the curatively intended therapy for most oesophageal cancer.<sup>9</sup> The objective of this study was to clarify the potential influence of marital status on the overall and disease-specific survival after curatively intended treatment of oesophageal cancer using a nationwide population-based design, taking into account the known major prognostic variables.

1  
2  
3  
4  
5  
6  
7  
8  
9  
10  
11  
12  
13  
14  
15  
16  
17  
18  
19  
20  
21  
22  
23  
24  
25  
26  
27  
28  
29  
30  
31  
32  
33  
34  
35  
36  
37  
38  
39  
40  
41  
42  
43  
44  
45  
46  
47  
48  
49  
50  
51  
52  
53  
54  
55  
56  
57  
58  
59  
60

For peer review only

## Methods

### *Participants*

This was a population-based prospective cohort study, which included 90% of all patients with oesophageal or gastroesophageal junctional cancer treated with surgery, the treatment of choice for potentially curable patients in Sweden during the study period, April 2, 2001 and December 31, 2005. Follow-up for survival ended in August 31, 2012. The median duration of follow-up was 619 days. From the full study cohort of 616 patients, 10 patients were excluded because of missing values for marital status, leaving 606 patients for final analysis. The study was approved by the Regional Ethical Review Board in Stockholm, Sweden. Informed consent was obtained from each patient before inclusion in the study.

### *Data sources*

The organization of the comprehensive nationwide network of clinicians that participated in the data collection has been described elsewhere, and most parts of the design of this clinical cohort study has been presented in detail.<sup>10 11</sup> In brief, information about tumour stage, histology and localization, surgical procedures and complications were prospectively collected for all patients through scrutiny of relevant medical records from 174 hospital departments in Sweden.<sup>11</sup> In September 2012, the cohort was linked to the Patient Register, the Causes of Death Register, and the Longitudinal Integration Database for Health Insurance and Labour Market Studies (LISA). The Patient Register includes all in-hospital care and outpatient specialist care in Sweden, including codes for diagnoses, surgical procedures and comorbidity with a high level of validity.<sup>12</sup> The Causes of Death Register contains information on date and cause of death for all deceased Swedish residents since 1952.<sup>13</sup> The LISA came into use in 1990 and includes a large variety of variables, including socio-economic status, marital status and work history.<sup>14</sup>

### *Study exposure and outcome*

Four mutually exclusive categories for marital status during the calendar year before surgery were: married (never divorced or widowed), remarried (after widowhood or divorce), previously married (widowed or divorced), and never married. An additional analysis was performed grouping all patients in 2 groups: the currently married (married and remarried) and the not currently married patients (previously married and never married).

The main outcome measure was overall mortality (including all causes of death) up to 5 years after oesophagectomy for oesophageal cancer. Other outcomes were mortality within 5 years after surgery: 1) after exclusion of deaths within first 90 days of surgery (defined as conditional mortality), 2) with oesophageal cancer as an underlying or contributing cause of death (disease-specific mortality, or death related to oesophageal cancer), and 3) the combination of conditional and disease-specific mortality.

### *Statistical analyses*

The association between marital status and mortality was analysed by means of multivariable Cox regression and expressed as hazard ratios (HRs) with 95% confidence intervals (CIs). The married group was used as reference category. Three regression models were employed: 1) without any adjustments (crude model), 2) adjusted for sex, age and tumour stage (basic model), and 3) further adjusted for histological tumour type, major complications, comorbidities and annual surgeon volume of oesophagectomy for cancer (fully adjusted model)<sup>15</sup>. Due to the limited effect on survival, as shown in a previous study,<sup>7</sup> educational level was not included in the analyses. Age was categorised as <60, 60-74, or ≥75 years, and tumour stage as 0-I, II, III, or IV according to the sixth edition of the UICC (Union Internationale Contre le Cancer)<sup>16</sup>. Histological type was subdivided in adenocarcinoma and squamous cell carcinoma. Number of major

1  
2  
3 complications (within 30 days of surgery) and comorbidities were both categorised as none, one  
4  
5 or more than one, as described previously.<sup>11 17</sup> Surgeon volume was categorised into two equally  
6  
7 sized groups based on the median annual number of oesophagectomies per surgeon (<8 or ≥8).<sup>15</sup>  
8  
9 To assess effect modification, stratified survival analyses were performed for tumour stage and  
10  
11 histological type using the same regression models, without adjustment for the stratifying  
12  
13 variable.  
14

## 15 16 17 18 19 **Results**

### 20 21 *Patients*

22  
23 Characteristics of the 606 study patients are described in Table 1. At the time of surgery, 334  
24  
25 patients were married (55.1%), 56 were remarried (9.2%), 137 were married previously  
26  
27 (22.6%), and 79 patients were never married (13.0%). Compared to the married group, the re-  
28  
29 married and never married groups were younger (Table 1). The largest proportion of male  
30  
31 patients was found in the never married group (87.3%) and the smallest in the previously  
32  
33 married group (75.2%). Tumours were as likely to be of an advanced stage (stage IV) in all  
34  
35 four groups (range 10.2-12.0%), but fewer early tumours (stage I) were found in the never  
36  
37 married group (12.7%) compared to the married group (20.7%). Squamous cell carcinoma  
38  
39 was found more frequently in the previously married (29.9%) and never married groups  
40  
41 (30.4%), compared to the married (21.3%) and remarried group (23.2%). Of all patients, 53.6-  
42  
43 62.8% had co-morbidity at time of surgery, which was least in the remarried group. Married  
44  
45 patients were least likely to have been operated on by surgeons with a low annual volume,  
46  
47 compared to previously married patients (49.4% versus 58.4%). There were post-operative  
48  
49 complications in 35.6-41.8% of the patients. In total, 455 (75.1%) patients died within 5 years  
50  
51  
52  
53  
54  
55  
56  
57  
58  
59  
60

1  
2  
3 of surgery, of whom 429 (94.3%) had oesophageal cancer as an underlying or contributing  
4  
5 cause of death.  
6  
7

### 8 9 *Marital status and mortality*

10 The proportions of overall and conditional 5-year mortality were highest in the never married  
11  
12 group (Table 1). The absolute 5-year survival rates for married, remarried, previously  
13  
14 married, and never married patients were 25.7%, 37.5%, 22.6%, and 16.5% respectively.  
15  
16

17 Short-term mortality was slightly lower in the never married group (6.3% versus 8.1-8.9% in  
18  
19 the other groups) (Table 1). The HRs for mortality after oesophagectomy according to marital  
20  
21 status are presented in Table 2. Compared with the married group, no increased HRs of  
22  
23 mortality were found in the other marital status groups. The fully adjusted HR of overall 5-  
24  
25 year mortality was similar in never married patients compared to married patients (HR 1.02,  
26  
27 95% CI 0.77-1.35), and the corresponding HRs were very similar for disease-specific survival  
28  
29 and survival after excluding the initial 90 days after surgery (Table 2). The fully adjusted HR  
30  
31 for the various definitions of 5-year mortality was lower in the remarried group (HR ranging  
32  
33 from 0.74 to 0.80) and in the previously married group (HR ranging from 0.90 to 0.94), but no  
34  
35 statistically significant associations were identified (Table 2). The results for disease-specific  
36  
37 survival, and for overall or disease-specific survival after excluding the initial 90 days of  
38  
39 surgery, were all similar to the HRs of overall survival (Table 2). The fully adjusted HR for  
40  
41 overall mortality in the not currently married group is 0.98 (95% CI 0.80-1.19) compared to  
42  
43 the currently married group.  
44  
45  
46  
47  
48

49 The fully adjusted subgroup analyses for all-cause and disease-specific mortality by tumour  
50  
51 stage and histological type showed similar results as the main analyses, and no statistically  
52  
53 significant associations were identified (data not shown).  
54  
55  
56  
57  
58  
59  
60

## Discussion

This study did not show any improved survival among married oesophageal cancer patients undergoing oesophagectomy compared to other marital status groups after adjustment for several prognostic variables.

The main strength of this study is the population-based design with almost complete coverage, and complete follow-up of all patients operated in Sweden for oesophageal cancer in 2001-2005. Moreover, complete data on a large variety of variables enabled adjustment for known prognostic factors. Yet, among limitations are that influence of other confounders or residual confounding by the variables adjusted for, can never be ruled out. The statistical power was limited to detect weak associations, but large effects of marital status on survival in this cohort of cancer patients are unlikely. Changes in marital status after surgery were considered of limited impact on the results, since these only occurred in 3.3% of all patients. Moreover, we did not have data on co-habiting without being married, or extent of social networks, which could have led to an underestimation of potential associations. Despite the multi-centre design, differences between hospitals and treatment are unlikely to have influenced any associations between marital status and survival. Socio-economic variables such as ethnicity and income-level may have an impact on survival as well, yet the underlying mechanisms are different. Socio-economic inequality is a measure for life-time differences, whereas marital status reflects social support at the time of the disease.

The absence of a clear association between marital status and long-term survival, such as found for some other cancer types and oesophageal cancer in the large American study mentioned earlier (including all diagnosed patients),<sup>3 8</sup> might be a false negative result related to the relatively small sample size. Yet, it is also possible that the beneficial effect of being

1  
2  
3 married is non-existent for oesophageal cancer receiving surgery, which has a limited chance  
4  
5 of survival despite its curative intent.<sup>9</sup> Although being married might not influence the  
6  
7 survival, social support might be beneficial for other reasons, including health-related quality  
8  
9 of life in these patients. To conclude, this study showed no evidence of improved survival of  
10  
11 married compared to non-married patients after having undergone surgery for oesophageal  
12  
13 cancer.  
14  
15  
16  
17  
18  
19  
20  
21  
22  
23  
24  
25  
26  
27  
28  
29  
30  
31  
32  
33  
34  
35  
36  
37  
38  
39  
40  
41  
42  
43  
44  
45  
46  
47  
48  
49  
50  
51  
52  
53  
54  
55  
56  
57  
58  
59  
60

For peer review only

1  
2  
3  
4  
5 **Acknowledgements and Funding:** This work was supported by the Swedish Research  
6  
7 Council (SIMSAM) and the Swedish Cancer Society (Contract number: 13 0537).  
8  
9

10 **Authors' contributions:** All authors have made substantial contributions to conception and  
11  
12 design of the article, JL and PL have been responsible for the acquisition of the data, the  
13  
14 statistical analyses and interpretation of the data were performed by NB, FM and AJ; 2) NB  
15  
16 has drafted the manuscript, and all authors revised it critically for important intellectual  
17  
18 content; and 3) all authors have given final approval of the version to be published.  
19  
20  
21

22 **Competing interests:** The authors declare that they have no conflict of interest. The Swedish  
23  
24 Research Council (SIMSAM) and the Swedish Cancer Society, the funding sources had no  
25  
26 role in the design and conduct of the study, collection, management, analysis and  
27  
28 interpretation of the data, or preparation review or approval of the manuscript.  
29  
30  
31

32 **Data sharing statement:** No additional data available.  
33  
34  
35  
36  
37

#### 38 **List of abbreviations**

39  
40 CI: confidence interval  
41

42  
43 HR: hazard ratio  
44

45  
46 LISA: Longitudinal Integration Database for Health Insurance and Labour Market Studies  
47  
48  
49  
50  
51  
52  
53  
54  
55  
56  
57  
58  
59  
60

## References

1. Berkson J. Mortality and marital status. Reflections on the derivation of etiology from statistics. *Am J Public Health Nations Health* 1962;52:1318-29.
2. Rendall MS, Weden MM, Favreault MM, et al. The protective effect of marriage for survival: a review and update. *Demography* 2011;48(2):481-506.
3. Bailey J. Effects of marital status on cancer incidence and survival rates. *Am Fam Physician* 2009;80(10):1052; author reply 52.
4. Kravdal H, Syse A. Changes over time in the effect of marital status on cancer survival. *BMC Public Health* 2011;11:804.
5. Thrift AP, Nagle CM, Fahey PP, et al. Predictors of survival among patients diagnosed with adenocarcinoma of the esophagus and gastroesophageal junction. *Cancer Causes Control* 2012;23(4):555-64.
6. Gossage JA, Forshaw MJ, Khan AA, et al. The effect of economic deprivation on oesophageal and gastric cancer in a UK cancer network. *Int J Clin Pract* 2009;63(6):859-64.
7. Brusselaers N, Ljung R, Mattsson F, et al. Education level and survival after oesophageal cancer surgery: a prospective population-based cohort study. *BMJ Open* 2013;3(12):e003754.
8. Aizer AA, Chen MH, McCarthy EP, et al. Marital status and survival in patients with cancer. *J Clin Oncol* 2013;31(31):3869-76.
9. Lagergren J, Lagergren P. Recent developments in esophageal adenocarcinoma. *CA Cancer J Clin* 2013;63(4):232-48.

- 1  
2  
3 10. Lagergren J, Bergström R, Lindgren A, et al. Symptomatic gastroesophageal  
4 reflux as a risk factor for esophageal adenocarcinoma. *N Engl J Med*  
5 1999;340(11):825-31.  
6  
7  
8  
9  
10 11. Viklund P, Lindblad M, Lu M, et al. Risk factors for complications after  
11 esophageal cancer resection: a prospective population-based study in Sweden. *Ann*  
12 *Surg* 2006;243(2):204-11.  
13  
14 12. Lagergren K, Derogar M. Validation of oesophageal cancer surgery data in the  
15 Swedish Patient Registry. *Acta Oncol* 2012;51(1):65-8.  
16  
17 13. Johansson LA, Westerling R. Comparing Swedish hospital discharge records with  
18 death certificates: implications for mortality statistics. *Int J Epidemiol* 2000;29(3):495-  
19 502.  
20  
21 14. Statistics-Sweden. Longitudinell integrationsdatabas för Sjukförsäkrings- och  
22 Arbetsmarknadsstudier (LISA) 1990–2009, 2011.  
23  
24 15. Brusselaers N, Mattsson F, Lagergren J. Hospital and surgeon volume in relation  
25 to long-term survival after oesophagectomy: systematic review and meta-analysis. *Gut*  
26 2013.  
27  
28 16. Sobin L, Wittekind C. *International Union Against Cancer (UICC): Classification*  
29 *of malignant tumours*. 6th ed, 2002.  
30  
31 17. Backemar L, Djärv T, Wikman A, et al. The role of diabetes and other co-  
32 morbidities on survival after esophageal cancer surgery in a population-based study.  
33 *Am J Surg* 2013;doi: 10.1016/j.amjsurg.2013.01.035.  
34  
35  
36  
37  
38  
39  
40  
41  
42  
43  
44  
45  
46  
47  
48  
49  
50  
51  
52  
53  
54  
55  
56  
57  
58  
59  
60

**Table 1: Demographic, treatment, and tumour characteristics and mortality after oesophagectomy for cancer, categorised by marital status at the time of diagnosis.**

|                                     | Marital status |                  |                            |                      | Total        |
|-------------------------------------|----------------|------------------|----------------------------|----------------------|--------------|
|                                     | <i>Married</i> | <i>Remarried</i> | <i>Previously Married*</i> | <i>Never married</i> |              |
|                                     | <i>N (%)</i>   | <i>N (%)</i>     | <i>N (%)</i>               | <i>N (%)</i>         | <i>N (%)</i> |
| <b>Total</b>                        | 334 (55.1)     | 56 (9.2)         | 137 (22.6)                 | 79 (13.0)            | 606 (100.0)  |
| <b>Age</b>                          |                |                  |                            |                      |              |
| <60 years                           | 63 (18.9)      | 18 (32.1)        | 31 (22.6)                  | 33 (41.8)            | 145 (23.9)   |
| 60-74 years                         | 199 (59.6)     | 34 (60.7)        | 69 (50.4)                  | 37 (46.8)            | 339 (55.9)   |
| ≥75 years                           | 72 (21.6)      | 4 (7.1)          | 37 (27.0)                  | 9 (11.4)             | 122 (20.1)   |
| <b>Sex</b>                          |                |                  |                            |                      |              |
| Male                                | 270 (80.8)     | 45 (80.4)        | 103 (75.2)                 | 69 (87.3)            | 487 (80.4)   |
| Female                              | 64 (19.2)      | 11 (19.6)        | 34 (24.8)                  | 10 (12.7)            | 119 (19.6)   |
| <b>Tumour stage</b>                 |                |                  |                            |                      |              |
| 0-I                                 | 69 (20.7)      | 12 (21.4)        | 23 (16.8)                  | 10 (12.7)            | 114 (18.8)   |
| II                                  | 100 (29.9)     | 12 (21.4)        | 42 (30.7)                  | 24 (30.4)            | 178 (29.4)   |
| III                                 | 125 (37.4)     | 26 (46.4)        | 58 (42.3)                  | 36 (45.6)            | 245 (40.4)   |
| IV                                  | 40 (12.0)      | 6 (10.7)         | 14 (10.2)                  | 9 (11.4)             | 69 (11.4)    |
| <b>Histology</b>                    |                |                  |                            |                      |              |
| Adenocarcinoma                      | 263 (78.7)     | 43 (76.8)        | 96 (70.1)                  | 55 (69.6)            | 457 (75.4)   |
| Squamous cell carcinoma             | 71 (21.3)      | 13 (23.2)        | 41 (29.9)                  | 24 (30.4)            | 149 (24.6)   |
| <b>Co-morbidity</b>                 |                |                  |                            |                      |              |
| None                                | 126 (37.7)     | 26 (46.4)        | 51 (37.2)                  | 33 (41.8)            | 236 (38.9)   |
| One                                 | 117 (35.0)     | 21 (37.5)        | 49 (35.8)                  | 25 (31.7)            | 212 (35.0)   |
| More than one                       | 91 (27.3)      | 9 (16.1)         | 37 (27.0)                  | 21 (26.6)            | 158 (26.1)   |
| <b>Surgical volume</b>              |                |                  |                            |                      |              |
| Low (<8 operations/year)            | 165 (49.4)     | 30 (53.6)        | 80 (58.4)                  | 43 (54.4)            | 318 (52.5)   |
| High (≥8 operations/year)           | 169 (50.6)     | 26 (46.4)        | 57 (41.6)                  | 36 (45.6)            | 288 (47.5)   |
| <b>Post-operative complications</b> |                |                  |                            |                      |              |
| None                                | 215 (64.4)     | 35 (62.5)        | 85 (62.0)                  | 46 (58.2)            | 381 (62.9)   |
| One                                 | 85 (25.5)      | 14 (25.0)        | 28 (20.4)                  | 17 (21.5)            | 144 (23.8)   |
| More than one                       | 34 (10.2)      | 7 (12.5)         | 24 (17.5)                  | 16 (20.3)            | 81 (13.4)    |
| <b>Mortality, 90 days</b>           |                |                  |                            |                      |              |
| Within 90 days                      | 27 (8.1)       | 5 (8.9)          | 11 (8.0)                   | 5 (6.3)              | 48 (7.9)     |
| Overall within 5 years              | 248 (74.3)     | 35 (62.5)        | 106 (77.4)                 | 66 (83.5)            | 455 (75.1)   |
| Conditional within 5 years**        | 221 (72.0)     | 30 (58.8)        | 95 (75.4)                  | 61 (82.4)            | 407 (72.9)   |

\*Previously married was defined as patients who have been married before but are living alone (after death of partner or divorce). \*\*Conditional mortality: excluding first 90 days after surgery.

**Table 2: Multi-variable Cox regression models analysing the association between marital status at the time of diagnosis and mortality after oesophagectomy for cancer, expressed as hazard ratios (HR) with 95% confidence intervals (CI).**

|                                                                               | Marital status                 |                                  |                                                |                                      |
|-------------------------------------------------------------------------------|--------------------------------|----------------------------------|------------------------------------------------|--------------------------------------|
|                                                                               | <i>Married<br/>(Reference)</i> | <i>Remarried<br/>HR (95% CI)</i> | <i>Previously<br/>married*<br/>HR (95% CI)</i> | <i>Never married<br/>HR (95% CI)</i> |
| <b>Overall 5-year mortality</b>                                               |                                |                                  |                                                |                                      |
| <i>Model 1</i>                                                                | 1                              | 0.77 (0.54-1.10)                 | 1.09 (0.87-1.37)                               | 1.14 (0.87-1.49)                     |
| <i>Model 2</i>                                                                | 1                              | 0.79 (0.55-1.13)                 | 0.95 (0.75-1.20)                               | 1.03 (0.78-1.36)                     |
| <i>Model 3</i>                                                                | 1                              | 0.79 (0.55-1.13)                 | 0.90 (0.71-1.15)                               | 1.02 (0.77-1.35)                     |
| <b>Conditional<sup>a</sup> overall 5-year mortality</b>                       |                                |                                  |                                                |                                      |
| <i>Model 1</i>                                                                | 1                              | 0.73 (0.50-1.07)                 | 1.11 (0.87-1.41)                               | 1.18 (0.89-1.57)                     |
| <i>Model 2</i>                                                                | 1                              | 0.73 (0.50-1.08)                 | 0.96 (0.75-1.23)                               | 1.04 (0.78-1.38)                     |
| <i>Model 3</i>                                                                | 1                              | 0.74 (0.50-1.08)                 | 0.93 (0.72-1.20)                               | 1.05 (0.78-1.41)                     |
| <b>Disease-specific<sup>b</sup> 5-year mortality</b>                          |                                |                                  |                                                |                                      |
| <i>Model 1</i>                                                                | 1                              | 0.79 (0.56-1.13)                 | 1.11 (0.88-1.40)                               | 1.19 (0.89-1.57)                     |
| <i>Model 2</i>                                                                | 1                              | 0.80 (0.56-1.15)                 | 0.96 (0.76-1.22)                               | 1.03 (0.77-1.34)                     |
| <i>Model 3</i>                                                                | 1                              | 0.80 (0.56-1.15)                 | 0.92 (0.72-1.17)                               | 1.04 (0.78-1.39)                     |
| <b>Conditional<sup>a</sup> disease- specific<sup>b</sup> 5-year mortality</b> |                                |                                  |                                                |                                      |
| <i>Model 1</i>                                                                | 1                              | 0.75 (0.51-1.10)                 | 1.12 (0.87-1.43)                               | 1.21 (0.90-1.63)                     |
| <i>Model 2</i>                                                                | 1                              | 0.74 (0.50-1.09)                 | 0.97 (0.76-1.25)                               | 1.02 (0.76-1.38)                     |
| <i>Model 3</i>                                                                | 1                              | 0.74 (0.51-1.10)                 | 0.94 (0.73-1.22)                               | 1.05 (0.78-1.42)                     |

Values are expressed as hazard ratios (HR). \*Previously married was defined as patients who have been married before but are living alone (after death of partner or divorce). <sup>a</sup>Conditional mortality: excluding first 90 days after surgery. <sup>b</sup>Disease-specific mortality: oesophageal or junctional cancer as underlying or contributing cause. Model 1: unadjusted. Model 2: adjusted for sex, age, tumour stage. Model 3: adjusted for sex, age, tumour stage, histology, major complications, comorbidity and surgeon volume.

1  
2  
3 **Marital status and survival after oesophageal cancer surgery:**

4  
5  
6 **A population-based nationwide cohort study in Sweden**

7  
8  
9  
10  
11 **Authors:** Nele BRUSSELAERS MD PhD<sup>1</sup>, Fredrik MATTSSON BSc<sup>1</sup>, Asif JOHAR MSc<sup>1</sup>,  
12  
13 Anna WIKMAN PhD<sup>1</sup>, Pernilla LAGERGREN PhD<sup>1</sup>, Jesper LAGERGREN MD PhD<sup>1,2</sup>  
14  
15 Rickard LJUNG MD PhD<sup>1,3</sup>.  
16

17  
18  
19  
20  
21 **Affiliations:** <sup>1</sup>Unit of Upper Gastrointestinal Research, Department of Molecular medicine  
22  
23 and Surgery, Karolinska Institutet, Stockholm, Sweden.

24  
25 <sup>2</sup>Division of Cancer Studies, King's College London, London, United Kingdom.

26  
27 <sup>3</sup>Unit of Epidemiology, Institute of Environmental Medicine, Karolinska Institutet,  
28  
29 Stockholm, Sweden.  
30

31  
32 **Email addresses:** [nele.brusselaers@ki.se](mailto:nele.brusselaers@ki.se); [fredrik.mattsson@ki.se](mailto:fredrik.mattsson@ki.se); [asif.johar@ki.se](mailto:asif.johar@ki.se);  
33  
34 [anna.wikman@ki.se](mailto:anna.wikman@ki.se); [pernilla.lagergren@ki.se](mailto:pernilla.lagergren@ki.se); [jesper.lagergren@ki.se](mailto:jesper.lagergren@ki.se); [rickard.ljung@ki.se](mailto:rickard.ljung@ki.se).  
35

36  
37 **Corresponding author:** Dr. Nele Brusselaers, Unit of Upper Gastrointestinal Research,  
38  
39 Department of Molecular medicine and Surgery, Norra Stationsgatan 67, Level 2, Karolinska  
40  
41 Institutet, SE-171 76 Stockholm, Sweden.

42  
43  
44 Telephone: +46 (0)8 517 709 42. Fax: +46 (0)8 517 709 42. E-mail: [nele.brusselaers@ki.se](mailto:nele.brusselaers@ki.se)  
45  
46  
47  
48  
49

50 **Word count:** 1761  
51  
52  
53  
54  
55  
56  
57  
58  
59  
60

1  
2  
3 **Abstract** (word count: 250)  
4

5  
6 **Objectives:** A beneficial effect of being married on survival has been shown for several  
7  
8 cancer types, but is unclear for oesophageal cancer. The objective of this study was to clarify  
9  
10 the potential influence of marital status on the overall and disease-specific survival after  
11  
12 curatively intended treatment of oesophageal cancer using a nationwide population-based  
13  
14 design, taking into account the known major prognostic variables.

15  
16  
17 **Design:** Prospective, population-based cohort  
18

19  
20 **Setting:** All Swedish hospitals performing surgery for oesophageal cancer during 2001-2005  
21

22  
23 **Participants:** This study included 90% of all oesophageal or junctional cancer patients who  
24  
25 underwent surgical resection in Sweden in 2001-2005, with follow-up until death or end of  
26  
27 study period (2012).

28  
29 **Primary and secondary outcome measures:** Cox regression was used to estimate associations  
30  
31 between marital status and 5-year overall and disease-specific mortality, expressed as hazard  
32  
33 ratios (HRs) with 95% confidence intervals (CIs), with adjustment for sex, age, tumour stage,  
34  
35 histological type, complications, comorbidities and annual surgeon volume.

36  
37 **Results:** Of all 606 included patients (80.4% male), 55.1% were married, 9.2% remarried,  
38  
39 22.6% previously married, and 13.0% never married. Compared to married patients, never  
40  
41 married (HR 1.02, 95% CI 0.77-1.35), previously married (HR 0.90, 95% CI 0.71-1.15) and  
42  
43 remarried patients (HR 0.79, 95% CI 0.55-1.13) had no increased overall 5-year mortality.  
44  
45 The corresponding HRs for disease-specific survival, and after excluding the initial 90 days of  
46  
47 surgery were similar to the HRs of overall survival.

48  
49  
50 **Conclusions:** This study showed no evidence of a better 5-year survival in married compared  
51  
52 to non-married patients undergoing surgery for oesophageal cancer.  
53  
54  
55  
56  
57  
58  
59  
60

1  
2  
3 **Keywords:** Socioeconomic factors; civil status; health status disparities; prognosis; outcome;  
4  
5 oesophagectomy.  
6  
7

### 8 9 **Strengths and limitations of this study**

10 Patients with oesophageal cancer have a poor prognosis, even those patients eligible for  
11  
12 curative surgery (oesophagectomy).  
13

14 Being married has been shown to be a marker of better survival after cancer in general and of  
15  
16 specific cancer types, but this has not been studied yet for oesophageal cancer.  
17  
18

19 This nationwide population-based study did not find any evidence that marital status  
20  
21 influences long-term survival after oesophagectomy for oesophageal cancer, even after taking  
22  
23 into account the known major prognostic variables.  
24  
25

26 The absence of a clear association between marital status and long-term survival, might be a  
27  
28 false negative result related to the relatively small sample size. Yet, it is also possible that the  
29  
30 beneficial effect of being married is non-existent for oesophageal cancer.  
31  
32

33 The main strength of this study is the population-based design with almost complete  
34  
35 coverage, and complete follow-up of all patients operated in Sweden for oesophageal cancer  
36  
37 in 2001-2005. Moreover, complete data on a large variety of variables enabled adjustment for  
38  
39 known prognostic factors. Yet, among limitations are that influence of other confounders or  
40  
41 residual confounding by the variables adjusted for, can never be ruled out. The statistical  
42  
43 power was however limited to detect weak associations.  
44  
45  
46  
47  
48

49 **Acknowledgements:** This work was supported by the Swedish Research Council (SIMSAM)  
50  
51 and the Swedish Cancer Society (Contract number: 13 0537).  
52  
53  
54  
55  
56  
57  
58  
59  
60

1  
2  
3 **Competing interests:** The authors declare that they have no conflict of interest. The Swedish  
4  
5 Research Council (SIMSAM) and the Swedish Cancer Society, the funding sources had no  
6  
7 role in the design and conduct of the study, collection, management, analysis and  
8  
9 interpretation of the data, or preparation review or approval of the manuscript.  
10

11  
12 **Data sharing statement:** There is no additional data available  
13  
14  
15  
16  
17  
18  
19  
20  
21  
22  
23  
24  
25  
26  
27  
28  
29  
30  
31  
32  
33  
34  
35  
36  
37  
38  
39  
40  
41  
42  
43  
44  
45  
46  
47  
48  
49  
50  
51  
52  
53  
54  
55  
56  
57  
58  
59  
60

For peer review only

## Introduction

The potential influence of marital status on health and life expectancy has since long been a matter of discussion.<sup>1 2</sup> Being married has been shown to be a marker of better survival after cancer in general and of specific cancer types,<sup>3</sup> and the survival discrepancy between married and non-married cancer patients has been claimed to be increasing over time.<sup>4</sup> Having a partner is believed to lead to a healthier lifestyle, e.g. regarding tobacco and alcohol use, physical activity, and social support, and can also influence the choice and adherence to treatment, as well as the time elapsing between early symptoms and a confirmed cancer diagnosis.<sup>2</sup> However, little is known about such influence on oesophageal cancer. Only a few studies have investigated the potential role of socio-economic factors in the prognosis of oesophageal cancer.<sup>5 6</sup> A previous study from our group showed limited evidence of an association between lower education and worse long-term survival in operated patients with oesophageal cancer (only significant difference in patients with tumour stage IV).<sup>7</sup> A recent American study showed that married patients were more likely to be diagnosed with localised disease, and received treatment with curative intent more frequently than non-married patients, also showing a better overall survival.<sup>8</sup> However, patients with oesophageal cancer have an overall very poor prognosis, mainly due to advanced tumour at the time of diagnosis, and only a minority is eligible for curatively intended treatment.<sup>9</sup> **Surgery (oesophagectomy) plays a main role in the curatively intended therapy for most oesophageal cancer** ~~is the cornerstone in radical therapy, and is often combined with oncological therapy.~~<sup>9</sup> The objective of this study was to clarify the potential influence of marital status on the overall and disease-specific survival after curatively intended treatment of oesophageal cancer using a nationwide population-based design, taking into account the known major prognostic variables.

## Methods

### *Participants*

This was a population-based prospective cohort study, which included 90% of all patients with oesophageal or gastroesophageal junctional cancer treated with surgery, the treatment of choice for potentially curable patients in Sweden during the study period, April 2, 2001 and December 31, 2005. Follow-up for survival ended in August 31, 2012. The median duration of follow-up was 619 days. From the full study cohort of 616 patients, 10 patients were excluded because of missing values for marital status, leaving 606 patients for final analysis. The study was approved by the Regional Ethical Review Board in Stockholm, Sweden. Informed consent was obtained from each patient before inclusion in the study.

### *Data sources*

The organization of the comprehensive nationwide network of clinicians that participated in the data collection has been described elsewhere, and most parts of the design of this clinical cohort study has been presented in detail.<sup>10 11</sup> In brief, information about tumour stage, histology and localization, surgical procedures and complications were prospectively collected for all patients through scrutiny of relevant medical records from 174 hospital departments in Sweden.<sup>11</sup> In September 2012, the cohort was linked to the Patient Register, the Causes of Death Register, and the Longitudinal Integration Database for Health Insurance and Labour Market Studies (LISA). The Patient Register includes all in-hospital care and outpatient specialist care in Sweden, including codes for diagnoses, surgical procedures and comorbidity with a high level of validity.<sup>12</sup> The Causes of Death Register contains information on date and cause of death for all deceased Swedish residents since 1952.<sup>13</sup> The LISA came into use in 1990 and includes a large variety of variables, including socio-economic status, marital status and work history.<sup>14</sup>

### *Study exposure and outcome*

Four mutually exclusive categories for marital status during the calendar year before surgery were: married (never divorced or widowed), remarried (after widowhood or divorce), previously married (widowed or divorced), and never married. An additional analysis was performed grouping all patients in 2 groups: the currently married (married and remarried) and the not currently married patients (previously married and never married).

The main outcome measure was overall mortality (including all causes of death) up to 5 years after oesophagectomy for oesophageal cancer. Other outcomes were mortality within 5 years after surgery: 1) after exclusion of deaths within first 90 days of surgery (defined as conditional mortality), 2) with oesophageal cancer as an underlying or contributing cause of death (disease-specific mortality, or death related to oesophageal cancer), and 3) the combination of conditional and disease-specific mortality.

### *Statistical analyses*

The association between marital status and mortality was analysed by means of multivariable Cox regression and expressed as hazard ratios (HRs) with 95% confidence intervals (CIs). The married group was used as reference category. Three regression models were employed: 1) without any adjustments (crude model), 2) adjusted for sex, age and tumour stage (basic model), and 3) further adjusted for histological tumour type, major complications, comorbidities and annual surgeon volume of oesophagectomy for cancer (fully adjusted model)<sup>15</sup>. Due to the limited effect on survival, as shown in a previous study,<sup>7</sup> educational level was not included in the analyses. Age was categorised as <60, 60-74, or ≥75 years, and tumour stage as 0-I, II, III, or IV according to the sixth edition of the UICC (Union Internationale Contre le Cancer)<sup>16</sup>. Histological type was subdivided in adenocarcinoma and squamous cell carcinoma. Number of major

1  
2  
3 complications (within 30 days of surgery) and comorbidities were both categorised as none, one  
4  
5 or more than one, as described previously.<sup>11 17</sup> Surgeon volume was categorised into two equally  
6  
7 sized groups based on the median annual number of oesophagectomies per surgeon (<8 or ≥8).<sup>15</sup>  
8  
9 To assess effect modification, stratified survival analyses were performed for tumour stage and  
10  
11 histological type using the same regression models, without adjustment for the stratifying  
12  
13 variable.  
14  
15

## 19 Results

### 21 *Patients*

22  
23 Characteristics of the 606 study patients are described in Table 1. At the time of surgery, 334  
24  
25 patients were married (55.1%), 56 were remarried (9.2%), 137 were married previously  
26  
27 (22.6%), and 79 patients were never married (13.0%). Compared to the married group, the re-  
28  
29 married and never married groups were younger (Table 1). The largest proportion of male  
30  
31 patients was found in the never married group (87.3%) and the smallest in the previously  
32  
33 married group (75.2%). Tumours were as likely to be of an advanced stage (stage IV) in all  
34  
35 four groups (range 10.2-12.0%), but fewer early tumours (stage I) were found in the never  
36  
37 married group (12.7%) compared to the married group (20.7%). Squamous cell carcinoma  
38  
39 was found more frequently in the previously married (29.9%) and never married groups  
40  
41 (30.4%), compared to the married (21.3%) and remarried group (23.2%). Of all patients, 53.6-  
42  
43 62.8% had co-morbidity at time of surgery, which was least in the remarried group. Married  
44  
45 patients were least likely to have been operated on by surgeons with a low annual volume,  
46  
47 compared to previously married patients (49.4% versus 58.4%). There were post-operative  
48  
49 complications in 35.6-41.8% of the patients. In total, 455 (75.1%) patients died within 5 years  
50  
51  
52  
53  
54  
55  
56  
57  
58  
59  
60

1  
2  
3 of surgery, of whom 429 (94.3%) had oesophageal cancer as an underlying or contributing  
4  
5 cause of death.  
6  
7

### 8 9 *Marital status and mortality*

10  
11 The proportions of overall and conditional 5-year mortality were highest in the never married  
12  
13 group (Table 1). The absolute 5-year survival rates for married, remarried, previously  
14  
15 married, and never married patients were 25.7%, 37.5%, 22.6%, and 16.5% respectively.  
16  
17 Short-term mortality was slightly lower in the never married group (6.3% versus 8.1-8.9% in  
18  
19 the other groups) (Table 1). The HRs for mortality after oesophagectomy according to marital  
20  
21 status are presented in Table 2. Compared with the married group, no increased HRs of  
22  
23 mortality were found in the other marital status groups. The fully adjusted HR of overall 5-  
24  
25 year mortality was similar in never married patients compared to married patients (HR 1.02,  
26  
27 95% CI 0.77-1.35), and the corresponding HRs were very similar for disease-specific survival  
28  
29 and survival after excluding the initial 90 days after surgery (Table 2). The fully adjusted HR  
30  
31 for the various definitions of 5-year mortality was lower in the remarried group (HR ranging  
32  
33 from 0.74 to 0.80) and in the previously married group (HR ranging from 0.90 to 0.94), but no  
34  
35 statistically significant associations were identified (Table 2). The results for disease-specific  
36  
37 survival, and for overall or disease-specific survival after excluding the initial 90 days of  
38  
39 surgery, were all similar to the HRs of overall survival (Table 2). **The fully adjusted HR for  
40  
41 overall mortality in the not currently married group is 0.98 (95% CI 0.80-1.19) compared to  
42  
43 the currently married group.**  
44  
45  
46  
47  
48

49 The fully adjusted subgroup analyses for all-cause and disease-specific mortality by tumour  
50  
51 stage and histological type showed similar results as the main analyses, and no statistically  
52  
53 significant associations were identified (data not shown).  
54  
55  
56  
57  
58  
59  
60

## Discussion

This study did not show any improved survival among married oesophageal cancer patients undergoing oesophagectomy compared to other marital status groups after adjustment for several prognostic variables.

The main strength of this study is the population-based design with almost complete coverage, and complete follow-up of all patients operated in Sweden for oesophageal cancer in 2001-2005. Moreover, complete data on a large variety of variables enabled adjustment for known prognostic factors. Yet, among limitations are that influence of other confounders or residual confounding by the variables adjusted for, can never be ruled out. The statistical power was limited to detect weak associations, **but large effects of marital status on survival in this cohort of cancer patients are unlikely.** Changes in marital status after surgery were considered of limited impact on the results, since these only occurred in 3.3% of all patients. Moreover, we did not have data on co-habiting without being married, or extent of social networks, which could have led to an underestimation of potential associations. Despite the multi-centre design, differences between hospitals and treatment are unlikely to have influenced any associations between marital status and survival. **Socio-economic variables such as ethnicity and income-level may have an impact on survival as well, yet the underlying mechanisms are different. Socio-economic inequality is a measure for life-time differences, whereas marital status reflects social support at the time of the disease.**

The absence of a clear association between marital status and long-term survival, such as found for some other cancer types and oesophageal cancer in the large American study mentioned earlier (including all diagnosed patients),<sup>3 8</sup> might be a false negative result related to the relatively small sample size. Yet, it is also possible that the beneficial effect of being

1  
2  
3 married is non-existent for oesophageal cancer receiving surgery, which has a limited chance  
4  
5 of survival despite its curative intent.<sup>9</sup> **Although being married might not influence the**  
6  
7 **survival, social support might be beneficial for other reasons, including health-related quality**  
8  
9 **of life in these patients.** To conclude, this study showed no evidence of improved survival of  
10  
11 married compared to non-married patients after having undergone surgery for oesophageal  
12  
13 cancer.  
14

## 15 16 17 **List of abbreviations**

18  
19  
20 CI: confidence interval

21  
22  
23 HR: hazard ratio

24  
25  
26 LISA: Longitudinal Integration Database for Health Insurance and Labour Market Studies  
27  
28  
29  
30  
31

32 **Authors' contributions:** All authors have made substantial contributions to conception and  
33  
34 design of the article, JL and PL have been responsible for the acquisition of the data, the  
35  
36 statistical analyses and interpretation of the data were performed by NB, FM and AJ; 2) NB  
37  
38 has drafted the manuscript, and all authors revised it critically for important intellectual  
39  
40 content; and 3) all authors have given final approval of the version to be published.  
41  
42  
43  
44  
45  
46

## 47 **References**

- 48  
49 1. Berkson J. Mortality and marital status. Reflections on the derivation of etiology  
50  
51 from statistics. *Am J Public Health Nations Health* 1962;52:1318-29.  
52  
53 2. Rendall MS, Weden MM, Favreault MM, Waldron H. The protective effect of  
54  
55 marriage for survival: a review and update. *Demography* 2011;48(2):481-506.  
56  
57  
58  
59  
60

- 1  
2  
3 3. Bailey J. Effects of marital status on cancer incidence and survival rates. *Am Fam*  
4  
5 *Physician* 2009;80(10):1052; author reply 52.  
6
- 7  
8 4. Kravdal H, Syse A. Changes over time in the effect of marital status on cancer  
9  
10 survival. *BMC Public Health* 2011;11:804.
- 11  
12 5. Thrift AP, Nagle CM, Fahey PP, Smithers BM, Watson DI, Whiteman DC.  
13  
14 Predictors of survival among patients diagnosed with adenocarcinoma of the  
15  
16 esophagus and gastroesophageal junction. *Cancer Causes Control* 2012;23(4):555-64.  
17
- 18  
19 6. Gossage JA, Forshaw MJ, Khan AA, Mak V, Moller H, Mason RC. The effect of  
20  
21 economic deprivation on oesophageal and gastric cancer in a UK cancer network. *Int J*  
22  
23 *Clin Pract* 2009;63(6):859-64.
- 24  
25 7. Brusselaers N, Ljung R, Mattsson F, Johar A, Wikman A, Lagergren P, et al.  
26  
27 Education level and survival after oesophageal cancer surgery: a prospective  
28  
29 population-based cohort study. *BMJ Open* 2013;3(12):e003754.
- 30  
31 8. Aizer AA, Chen MH, McCarthy EP, Mendu ML, Koo S, Wilhite TJ, et al. Marital  
32  
33 status and survival in patients with cancer. *J Clin Oncol* 2013;31(31):3869-76.
- 34  
35 9. Lagergren J, Lagergren P. Recent developments in esophageal adenocarcinoma. *CA*  
36  
37 *Cancer J Clin* 2013;63(4):232-48.
- 38  
39 10. Lagergren J, Bergström R, Lindgren A, Nyrén O. Symptomatic gastroesophageal  
40  
41 reflux as a risk factor for esophageal adenocarcinoma. *N Engl J Med*  
42  
43 1999;340(11):825-31.  
44
- 45  
46 11. Viklund P, Lindblad M, Lu M, Ye W, Johansson J, Lagergren J. Risk factors for  
47  
48 complications after esophageal cancer resection: a prospective population-based study  
49  
50 in Sweden. *Ann Surg* 2006;243(2):204-11.  
51
- 52  
53 12. Lagergren K, Derogar M. Validation of oesophageal cancer surgery data in the  
54  
55 Swedish Patient Registry. *Acta Oncol* 2012;51(1):65-8.  
56  
57

- 1  
2  
3 13. Johansson LA, Westerling R. Comparing Swedish hospital discharge records with  
4 death certificates: implications for mortality statistics. *Int J Epidemiol* 2000;29(3):495-  
5 502.  
6  
7  
8  
9  
10 14. Statistics-Sweden. Longitudinell integrationsdatabas för Sjukförsäkrings- och  
11 Arbetsmarknadsstudier (LISA) 1990–2009, 2011.  
12  
13 15. Brusselaers N, Mattsson F, Lagergren J. Hospital and surgeon volume in relation  
14 to long-term survival after oesophagectomy: systematic review and meta-analysis. *Gut*  
15 2013.  
16  
17  
18  
19  
20 16. Sobin L, Wittekind C. *International Union Against Cancer (UICC): Classification*  
21 *of malignant tumours*. 6th ed, 2002.  
22  
23  
24  
25 17. Backemar L, Djärv T, Wikman A, Johar A, Ross P, Lagergren P, et al. The role of  
26 diabetes and other co-morbidities on survival after esophageal cancer surgery in a  
27 population-based study. *Am J Surg* 2013;doi: 10.1016/j.amjsurg.2013.01.035.  
28  
29  
30  
31  
32  
33  
34  
35  
36  
37  
38  
39  
40  
41  
42  
43  
44  
45  
46  
47  
48  
49  
50  
51  
52  
53  
54  
55  
56  
57  
58  
59  
60

**Table 1: Demographic, treatment, and tumour characteristics and mortality after oesophagectomy for cancer, categorised by marital status at the time of diagnosis.**

|                                     | Marital status |                  |                            |                      | Total        |
|-------------------------------------|----------------|------------------|----------------------------|----------------------|--------------|
|                                     | <i>Married</i> | <i>Remarried</i> | <i>Previously Married*</i> | <i>Never married</i> |              |
|                                     | <i>N (%)</i>   | <i>N (%)</i>     | <i>N (%)</i>               | <i>N (%)</i>         | <i>N (%)</i> |
| <b>Total</b>                        | 334 (55.1)     | 56 (9.2)         | 137 (22.6)                 | 79 (13.0)            | 606 (100.0)  |
| <b>Age</b>                          |                |                  |                            |                      |              |
| <60 years                           | 63 (18.9)      | 18 (32.1)        | 31 (22.6)                  | 33 (41.8)            | 145 (23.9)   |
| 60-74 years                         | 199 (59.6)     | 34 (60.7)        | 69 (50.4)                  | 37 (46.8)            | 339 (55.9)   |
| ≥75 years                           | 72 (21.6)      | 4 (7.1)          | 37 (27.0)                  | 9 (11.4)             | 122 (20.1)   |
| <b>Sex</b>                          |                |                  |                            |                      |              |
| Male                                | 270 (80.8)     | 45 (80.4)        | 103 (75.2)                 | 69 (87.3)            | 487 (80.4)   |
| Female                              | 64 (19.2)      | 11 (19.6)        | 34 (24.8)                  | 10 (12.7)            | 119 (19.6)   |
| <b>Tumour stage</b>                 |                |                  |                            |                      |              |
| 0-I                                 | 69 (20.7)      | 12 (21.4)        | 23 (16.8)                  | 10 (12.7)            | 114 (18.8)   |
| II                                  | 100 (29.9)     | 12 (21.4)        | 42 (30.7)                  | 24 (30.4)            | 178 (29.4)   |
| III                                 | 125 (37.4)     | 26 (46.4)        | 58 (42.3)                  | 36 (45.6)            | 245 (40.4)   |
| IV                                  | 40 (12.0)      | 6 (10.7)         | 14 (10.2)                  | 9 (11.4)             | 69 (11.4)    |
| <b>Histology</b>                    |                |                  |                            |                      |              |
| Adenocarcinoma                      | 263 (78.7)     | 43 (76.8)        | 96 (70.1)                  | 55 (69.6)            | 457 (75.4)   |
| Squamous cell carcinoma             | 71 (21.3)      | 13 (23.2)        | 41 (29.9)                  | 24 (30.4)            | 149 (24.6)   |
| <b>Co-morbidity</b>                 |                |                  |                            |                      |              |
| None                                | 126 (37.7)     | 26 (46.4)        | 51 (37.2)                  | 33 (41.8)            | 236 (38.9)   |
| One                                 | 117 (35.0)     | 21 (37.5)        | 49 (35.8)                  | 25 (31.7)            | 212 (35.0)   |
| More than one                       | 91 (27.3)      | 9 (16.1)         | 37 (27.0)                  | 21 (26.6)            | 158 (26.1)   |
| <b>Surgical volume</b>              |                |                  |                            |                      |              |
| Low (<8 operations/year)            | 165 (49.4)     | 30 (53.6)        | 80 (58.4)                  | 43 (54.4)            | 318 (52.5)   |
| High (≥8 operations/year)           | 169 (50.6)     | 26 (46.4)        | 57 (41.6)                  | 36 (45.6)            | 288 (47.5)   |
| <b>Post-operative complications</b> |                |                  |                            |                      |              |
| None                                | 215 (64.4)     | 35 (62.5)        | 85 (62.0)                  | 46 (58.2)            | 381 (62.9)   |
| One                                 | 85 (25.5)      | 14 (25.0)        | 28 (20.4)                  | 17 (21.5)            | 144 (23.8)   |
| More than one                       | 34 (10.2)      | 7 (12.5)         | 24 (17.5)                  | 16 (20.3)            | 81 (13.4)    |
| <b>Mortality, 90 days</b>           |                |                  |                            |                      |              |
| Within 90 days                      | 27 (8.1)       | 5 (8.9)          | 11 (8.0)                   | 5 (6.3)              | 48 (7.9)     |
| Overall within 5 years              | 248 (74.3)     | 35 (62.5)        | 106 (77.4)                 | 66 (83.5)            | 455 (75.1)   |
| Conditional within 5 years**        | 221 (72.0)     | 30 (58.8)        | 95 (75.4)                  | 61 (82.4)            | 407 (72.9)   |

\*Previously married was defined as patients who have been married before but are living alone (after death of partner or divorce). \*\*Conditional mortality: excluding first 90 days after surgery.

**Table 2: Multi-variable Cox regression models analysing the association between marital status at the time of diagnosis and mortality after oesophagectomy for cancer, expressed as hazard ratios (HR) with 95% confidence intervals (CI).**

|                                                                               | Marital status                 |                                  |                                                |                                      |
|-------------------------------------------------------------------------------|--------------------------------|----------------------------------|------------------------------------------------|--------------------------------------|
|                                                                               | <i>Married<br/>(Reference)</i> | <i>Remarried<br/>HR (95% CI)</i> | <i>Previously<br/>married*<br/>HR (95% CI)</i> | <i>Never married<br/>HR (95% CI)</i> |
| <b>Overall 5-year mortality</b>                                               |                                |                                  |                                                |                                      |
| <i>Model 1</i>                                                                | 1                              | 0.77 (0.54-1.10)                 | 1.09 (0.87-1.37)                               | 1.14 (0.87-1.49)                     |
| <i>Model 2</i>                                                                | 1                              | 0.79 (0.55-1.13)                 | 0.95 (0.75-1.20)                               | 1.03 (0.78-1.36)                     |
| <i>Model 3</i>                                                                | 1                              | 0.79 (0.55-1.13)                 | 0.90 (0.71-1.15)                               | 1.02 (0.77-1.35)                     |
| <b>Conditional<sup>a</sup> overall 5-year mortality</b>                       |                                |                                  |                                                |                                      |
| <i>Model 1</i>                                                                | 1                              | 0.73 (0.50-1.07)                 | 1.11 (0.87-1.41)                               | 1.18 (0.89-1.57)                     |
| <i>Model 2</i>                                                                | 1                              | 0.73 (0.50-1.08)                 | 0.96 (0.75-1.23)                               | 1.04 (0.78-1.38)                     |
| <i>Model 3</i>                                                                | 1                              | 0.74 (0.50-1.08)                 | 0.93 (0.72-1.20)                               | 1.05 (0.78-1.41)                     |
| <b>Disease-specific<sup>b</sup> 5-year mortality</b>                          |                                |                                  |                                                |                                      |
| <i>Model 1</i>                                                                | 1                              | 0.79 (0.56-1.13)                 | 1.11 (0.88-1.40)                               | 1.19 (0.89-1.57)                     |
| <i>Model 2</i>                                                                | 1                              | 0.80 (0.56-1.15)                 | 0.96 (0.76-1.22)                               | 1.03 (0.77-1.34)                     |
| <i>Model 3</i>                                                                | 1                              | 0.80 (0.56-1.15)                 | 0.92 (0.72-1.17)                               | 1.04 (0.78-1.39)                     |
| <b>Conditional<sup>a</sup> disease- specific<sup>b</sup> 5-year mortality</b> |                                |                                  |                                                |                                      |
| <i>Model 1</i>                                                                | 1                              | 0.75 (0.51-1.10)                 | 1.12 (0.87-1.43)                               | 1.21 (0.90-1.63)                     |
| <i>Model 2</i>                                                                | 1                              | 0.74 (0.50-1.09)                 | 0.97 (0.76-1.25)                               | 1.02 (0.76-1.38)                     |
| <i>Model 3</i>                                                                | 1                              | 0.74 (0.51-1.10)                 | 0.94 (0.73-1.22)                               | 1.05 (0.78-1.42)                     |

Values are expressed as hazard ratios (HR). \*Previously married was defined as patients who have been married before but are living alone (after death of partner or divorce). <sup>a</sup>Conditional mortality: excluding first 90 days after surgery. <sup>b</sup>Disease-specific mortality: oesophageal or junctional cancer as underlying or contributing cause. Model 1: unadjusted. Model 2: adjusted for sex, age, tumour stage. Model 3: adjusted for sex, age, tumour stage, histology, major complications, comorbidity and surgeon volume.

**STROBE 2007 (v4) checklist of items to be included in reports of observational studies in epidemiology\***  
**Checklist for cohort, case-control, and cross-sectional studies (combined)**

| Section/Topic             | Item # | Recommendation                                                                                                                                                                                                                                                                                                                                                                                                                                                         | Reported on page # |
|---------------------------|--------|------------------------------------------------------------------------------------------------------------------------------------------------------------------------------------------------------------------------------------------------------------------------------------------------------------------------------------------------------------------------------------------------------------------------------------------------------------------------|--------------------|
| Title and abstract        | 1      | (a) Indicate the study's design with a commonly used term in the title or the abstract                                                                                                                                                                                                                                                                                                                                                                                 | 1,2                |
|                           |        | (b) Provide in the abstract an informative and balanced summary of what was done and what was found                                                                                                                                                                                                                                                                                                                                                                    | 2                  |
| <b>Introduction</b>       |        |                                                                                                                                                                                                                                                                                                                                                                                                                                                                        |                    |
| Background/rationale      | 2      | Explain the scientific background and rationale for the investigation being reported                                                                                                                                                                                                                                                                                                                                                                                   | 5                  |
| Objectives                | 3      | State specific objectives, including any pre-specified hypotheses                                                                                                                                                                                                                                                                                                                                                                                                      | 5                  |
| <b>Methods</b>            |        |                                                                                                                                                                                                                                                                                                                                                                                                                                                                        |                    |
| Study design              | 4      | Present key elements of study design early in the paper                                                                                                                                                                                                                                                                                                                                                                                                                | 6,7                |
| Setting                   | 5      | Describe the setting, locations, and relevant dates, including periods of recruitment, exposure, follow-up, and data collection                                                                                                                                                                                                                                                                                                                                        | 6,7                |
| Participants              | 6      | (a) <i>Cohort study</i> —Give the eligibility criteria, and the sources and methods of selection of participants. Describe methods of follow-up<br><i>Case-control study</i> —Give the eligibility criteria, and the sources and methods of case ascertainment and control selection. Give the rationale for the choice of cases and controls<br><i>Cross-sectional study</i> —Give the eligibility criteria, and the sources and methods of selection of participants | 6,7                |
|                           |        | (b) <i>Cohort study</i> —For matched studies, give matching criteria and number of exposed and unexposed<br><i>Case-control study</i> —For matched studies, give matching criteria and the number of controls per case                                                                                                                                                                                                                                                 |                    |
| Variables                 | 7      | Clearly define all outcomes, exposures, predictors, potential confounders, and effect modifiers. Give diagnostic criteria, if applicable                                                                                                                                                                                                                                                                                                                               | 6,7                |
| Data sources/ measurement | 8*     | For each variable of interest, give sources of data and details of methods of assessment (measurement). Describe comparability of assessment methods if there is more than one group                                                                                                                                                                                                                                                                                   | 6,7                |
| Bias                      | 9      | Describe any efforts to address potential sources of bias                                                                                                                                                                                                                                                                                                                                                                                                              | 6,7                |
| Study size                | 10     | Explain how the study size was arrived at                                                                                                                                                                                                                                                                                                                                                                                                                              | 6,7                |
| Quantitative variables    | 11     | Explain how quantitative variables were handled in the analyses. If applicable, describe which groupings were chosen and why                                                                                                                                                                                                                                                                                                                                           | 7                  |
| Statistical methods       | 12     | (a) Describe all statistical methods, including those used to control for confounding                                                                                                                                                                                                                                                                                                                                                                                  | 7                  |
|                           |        | (b) Describe any methods used to examine subgroups and interactions                                                                                                                                                                                                                                                                                                                                                                                                    | 7                  |
|                           |        | (c) Explain how missing data were addressed                                                                                                                                                                                                                                                                                                                                                                                                                            | 7                  |
|                           |        | (d) <i>Cohort study</i> —If applicable, explain how loss to follow-up was addressed<br><i>Case-control study</i> —If applicable, explain how matching of cases and controls was addressed                                                                                                                                                                                                                                                                              | 7                  |

|                          |     |                                                                                                                                                                                                              |            |
|--------------------------|-----|--------------------------------------------------------------------------------------------------------------------------------------------------------------------------------------------------------------|------------|
|                          |     | <i>Cross-sectional study</i> —If applicable, describe analytical methods taking account of sampling strategy                                                                                                 |            |
|                          |     | (e) Describe any sensitivity analyses                                                                                                                                                                        | -          |
| <b>Results</b>           |     |                                                                                                                                                                                                              |            |
| Participants             | 13* | (a) Report numbers of individuals at each stage of study—eg numbers potentially eligible, examined for eligibility, confirmed eligible, included in the study, completing follow-up, and analysed            | 8          |
|                          |     | (b) Give reasons for non-participation at each stage                                                                                                                                                         | -          |
|                          |     | (c) Consider use of a flow diagram                                                                                                                                                                           | -          |
| Descriptive data         | 14* | (a) Give characteristics of study participants (eg demographic, clinical, social) and information on exposures and potential confounders                                                                     | 8          |
|                          |     | (b) Indicate number of participants with missing data for each variable of interest                                                                                                                          | 8          |
|                          |     | (c) <i>Cohort study</i> —Summarise follow-up time (eg, average and total amount)                                                                                                                             | 6, 8       |
| Outcome data             | 15* | <i>Cohort study</i> —Report numbers of outcome events or summary measures over time                                                                                                                          | 9, Table 1 |
|                          |     | <i>Case-control study</i> —Report numbers in each exposure category, or summary measures of exposure                                                                                                         | -          |
|                          |     | <i>Cross-sectional study</i> —Report numbers of outcome events or summary measures                                                                                                                           | -          |
| Main results             | 16  | (a) Give unadjusted estimates and, if applicable, confounder-adjusted estimates and their precision (eg, 95% confidence interval). Make clear which confounders were adjusted for and why they were included | 9, Table 2 |
|                          |     | (b) Report category boundaries when continuous variables were categorized                                                                                                                                    | -          |
|                          |     | (c) If relevant, consider translating estimates of relative risk into absolute risk for a meaningful time period                                                                                             | -          |
| Other analyses           | 17  | Report other analyses done—eg analyses of subgroups and interactions, and sensitivity analyses                                                                                                               | 9          |
| <b>Discussion</b>        |     |                                                                                                                                                                                                              |            |
| Key results              | 18  | Summarise key results with reference to study objectives                                                                                                                                                     | 10         |
| Limitations              | 19  | Discuss limitations of the study, taking into account sources of potential bias or imprecision. Discuss both direction and magnitude of any potential bias                                                   | 10         |
| Interpretation           | 20  | Give a cautious overall interpretation of results considering objectives, limitations, multiplicity of analyses, results from similar studies, and other relevant evidence                                   | 10         |
| Generalisability         | 21  | Discuss the generalisability (external validity) of the study results                                                                                                                                        | 10         |
| <b>Other information</b> |     |                                                                                                                                                                                                              |            |
| Funding                  | 22  | Give the source of funding and the role of the funders for the present study and, if applicable, for the original study on which the present article is based                                                | 3-4        |

\*Give information separately for cases and controls in case-control studies and, if applicable, for exposed and unexposed groups in cohort and cross-sectional studies.

**Note:** An Explanation and Elaboration article discusses each checklist item and gives methodological background and published examples of transparent reporting. The STROBE checklist is best used in conjunction with this article (freely available on the Web sites of PLoS Medicine at <http://www.plosmedicine.org/>, Annals of Internal Medicine at <http://www.annals.org/>, and Epidemiology at <http://www.epidem.com/>). Information on the STROBE Initiative is available at [www.strobe-statement.org](http://www.strobe-statement.org).
